# Supplementary material for: The brlA Gene Deletion Reveals That Patulin Biosynthesis Is Not Related to Conidiation in Penicillium expansum
Source: MDPI journal article supplement (doi:10.3390/ijms21186660), 2020-09-11
Supplement: s1 [file s1]

IJMS

# Supplementary Materials

**The *brlA* gene deletion reveals that patulin biosynthesis is not related to conidiation in *Penicillium expansum***

Chrystian Zetina-Serrano <sup>1</sup>, Ophélie Rocher <sup>1</sup>, Claire Naylies <sup>1</sup>, Yannick Lippi <sup>1</sup>,  
Isabelle P. Oswald <sup>1</sup>, Sophie Lorber <sup>1</sup> and Olivier Puel <sup>1,\*</sup>

<sup>1</sup> Toxalim (Research Centre in Food Toxicology), Université de Toulouse, INRAE, ENVT, INP-Purpan, UPS, Toulouse, France; Chrystian-Del-Carmen.Zetina-Serrano@inrae.fr (C.Z.); ophelie.rocher@inrae.fr (O.R.); claire.naylies@inrae.fr (C.N.); yannick.lippi@inrae.fr (Y.L.); isabelle.oswald@inrae.fr (I.O.); sophie.lorber@inrae.fr (S.L.); olivier.puel@inrae.fr (O.P.)

\* Correspondence: olivier.puel@inrae.fr; Tel.: +33 582 066 336

## Table of contents

|                                                                                                                                                                                                                                                      |             |
|------------------------------------------------------------------------------------------------------------------------------------------------------------------------------------------------------------------------------------------------------|-------------|
| <b>Supplementary Figure 1.</b> Morphological aspect of <i>Penicillium expansum</i> wild type NRRL 35695 and the null mutant <i>PeΔbrlA</i> strains.....                                                                                              | <b>33</b>   |
| <b>Supplementary Figure 2.</b> Rot growth rates obtained from Golden Delicious apples infected with <i>Penicillium expansum</i> wild type NRRL 35695 and the null mutant <i>PeΔbrlA</i> strains and incubated at 25 °C for 14 days in the dark. .... | <b>44</b>   |
| <b>Supplementary Figure 3.</b> Morphological aspect of A) Null mutant <i>PeΔbrlA</i> strain and B) <i>Penicillium expansum</i> wild type NRRL 35695 strain grown in a minimal media supplemented with galactose.....                                 | <b>55</b>   |
| <b>Supplementary Table 1.</b> MS/MS spectra of secondary metabolites detected from <i>Penicillium expansum</i> wild type NRRL 35695 after culture on labeled wheat grains. ....                                                                      | <b>66</b>   |
| <b>Supplementary Table 2.</b> MS/MS spectra of the specific secondary metabolites only detected in the null mutant <i>PeΔbrlA</i> strain after culture on labeled wheat grains. ....                                                                 | <b>1040</b> |
| <b>Supplementary Table 3.</b> Primers used in qPCR for analysis of putative chaetoglobosin gene clusters. ....                                                                                                                                       | <b>1242</b> |
| <b>Supplementary Figure 4.</b> Relative gene expression of the putative chaetoglobosin biosynthetic gene cluster (PEXP_073960-PEXP_074060) in <i>Penicillium expansum</i> wild type NRRL 35695 and the null mutant <i>PeΔbrlA</i> strains.....       | <b>1343</b> |
| <b>Supplementary Table 4.</b> <i>Penicillium expansum</i> genes orthologous to genes significantly down-regulated (Log <sub>2</sub> fold change < -3) in <i>Penicillium digitatum</i> <i>PdΔbrlA</i> strain [38]. ....                               | <b>1414</b> |
| <b>Supplementary Table 5.</b> <i>Penicillium expansum</i> genes orthologous to genes significantly up-regulated (Log <sub>2</sub> fold change > 2) in <i>Penicillium digitatum</i> <i>PdΔbrlA</i> strain [38]. ....                                  | <b>1818</b> |
| <b>Supplementary Table 6.</b> Eighteen orthologous genes similarly regulated to <i>wetA</i> in <i>Penicillium rubens</i> <i>ΔbrlA</i> [49] and <i>Penicillium expansum</i> <i>ΔbrlA</i> .....                                                        | <b>2020</b> |
| <b>Supplementary Table 7.</b> Fifty-nine orthologous genes similarly down-regulated to <i>abaA</i> in <i>Penicillium rubens</i> .....                                                                                                                | <b>2121</b> |
| <b>Construction and Characterization of the null mutant <i>PeΔbrlA</i> strain.....</b>                                                                                                                                                               | <b>2323</b> |
| <i>Creation of a Linear Transformation Cassette using Double-Joint PCR</i> .....                                                                                                                                                                     | <b>2323</b> |
| <b>Supplementary Table 8.</b> Primers used in the construction and the validation of the null mutant <i>PeΔbrlA</i> strain.....                                                                                                                      | <b>2424</b> |
| <b>Supplementary Figure 5.</b> Double-joint PCR reaction.....                                                                                                                                                                                        | <b>2525</b> |
| <b>Validation of the Null Mutant <i>PeΔbrlA</i> strain.....</b>                                                                                                                                                                                      | <b>2626</b> |
| <i>Polymerase Chain Reaction (PCR) and Genome Walking</i> .....                                                                                                                                                                                      | <b>2626</b> |
| <b>Supplementary Figure 6.</b> PCR amplification of <i>Penicillium expansum</i> wild type NRRL 35695 (WT) and null mutant <i>PeΔbrlA</i> strains. ....                                                                                               | <b>2727</b> |

|                                                                                                                                                                                                                                                              |                 |
|--------------------------------------------------------------------------------------------------------------------------------------------------------------------------------------------------------------------------------------------------------------|-----------------|
| <b>Supplementary Figure 7.</b> Genome walking (GW) analyses of genomic DNA of <i>Penicillium expansum</i> wild type NRRL 35695 and null mutant Pe $\Delta$ <i>brlA</i> strains. ....                                                                         | <del>2727</del> |
| <b>Quantitative real-time PCR Validation</b> .....                                                                                                                                                                                                           | <del>2828</del> |
| <b>Supplementary Figure 8.</b> Validation by quantitative real-time PCR analysis. The expression of the <i>brlA</i> gene was evaluated in <i>Penicillium expansum</i> wild type NRRL 35695 (WT) and in the null mutant Pe $\Delta$ <i>brlA</i> strains. .... | <del>2929</del> |

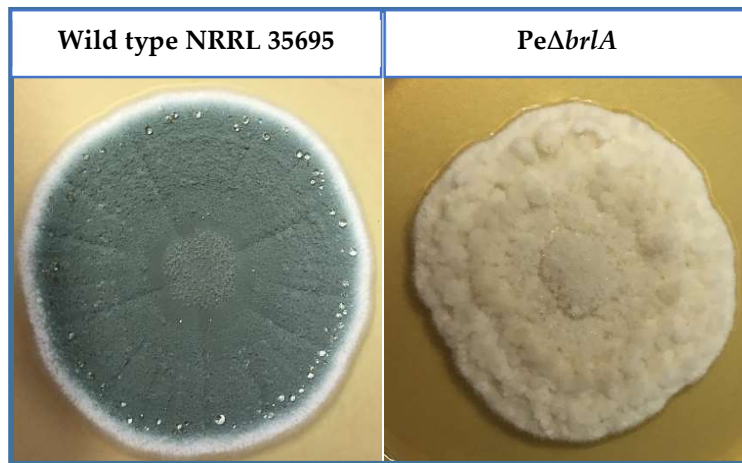

**Supplementary Figure 1.** Morphological aspect of *Penicillium expansum* wild type NRRL 35695 and the null mutant Pe $\Delta$ brlA strains. The strains were grown on MEA at 25 °C in the dark for seven days.

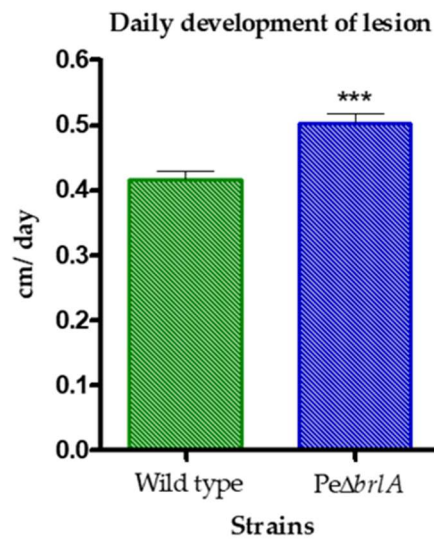

**Supplementary Figure 2.** Rot growth rates obtained from Golden Delicious apples infected with *Penicillium expansum* wild type NRRL 35695 and the null mutant PeΔbrlA strains and incubated at 25 °C for 14 days in the dark. The graph shows the mean  $\pm$  standard error of the mean (SEM) from nine biological replicates. \*\*\*  $p$ -value < 0.001.

A)

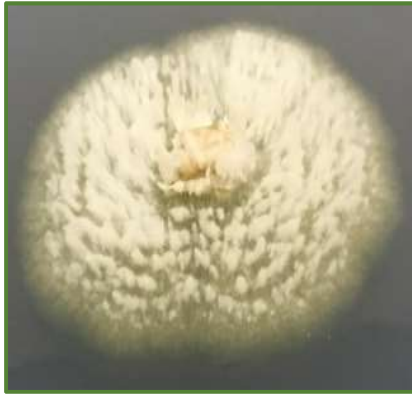

B)

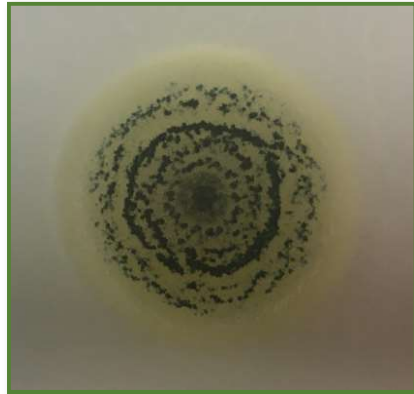

**Supplementary Figure 3.** Morphological aspect of A) Null mutant *PeΔbriA* strain and B) *Penicillium expansum* wild type NRRL 35695 strain grown in a minimal media supplemented with galactose and incubated for seven days at 25 °C in the dark. This medium promoted the development of coremia or synnemata.

**Supplementary Table 1.** MS/MS spectra of secondary metabolites detected from *Penicillium expansum* wild type NRRL 35695 after culture on labeled wheat grains.

| Molecular formula                                                            | Identifier <sup>a</sup>  | <sup>12</sup> C <i>m/z</i><br>(Da) | <sup>13</sup> C <i>m/z</i><br>(Da) | <sup>13</sup> C/ <sup>15</sup> N <i>m/z</i><br>(Da) | <i>m/z</i> of major fragment ions                     |
|------------------------------------------------------------------------------|--------------------------|------------------------------------|------------------------------------|-----------------------------------------------------|-------------------------------------------------------|
| <b>C<sub>7</sub>H<sub>6</sub>O<sub>4</sub></b>                               | <b>Pexp_153.019_3.59</b> | <b>153.01919</b>                   | <b>160.04256</b>                   | <b>156.02997</b>                                    | <b>153→ 125, 109(100), 97</b>                         |
| C <sub>7</sub> H <sub>8</sub> O                                              | Pexp_109.065_7.11        | 109.06509                          | 116.08844                          | 112.07483                                           | -                                                     |
| C <sub>7</sub> H <sub>8</sub> O <sub>2</sub>                                 | Pexp_125.060_6.79        | 125.05998                          | 132.08346                          | 129.07332                                           | 125→ 106(100), 97, 95, 83, 81, 79, 69                 |
| C <sub>7</sub> H <sub>8</sub> O <sub>3</sub>                                 | Pexp_141.054_3.80        | 141.05493                          | 148.07869                          | 144.06492                                           | 141→ 123, 113(100), 110, 95, 79, 69, 55               |
| C <sub>7</sub> H <sub>8</sub> O <sub>4</sub>                                 | Pexp_157.049_2.67        | 157.04990                          | 164.07348                          | 161.06366                                           | 157→ 139(100), 111, 97, 83                            |
| C <sub>7</sub> H <sub>10</sub> O <sub>3</sub>                                | Pexp_143.070_4.52        | 143.07061                          | 150.09415                          | 147.08401                                           | 143→ 125, 113(100), 107, 97, 79                       |
| C <sub>10</sub> H <sub>17</sub> NO <sub>5</sub>                              | Pexp_232.118_8.83        | 232.11872                          | 242.15222                          | 238.13252                                           | 232→ 214, 185, 157, 119 (100), 112, 101, 86           |
| C <sub>12</sub> H <sub>14</sub> O <sub>3</sub>                               | Pexp_207.101_9.65        | 207.10110                          | 219.14115                          | 213.12114                                           | 207→ 189(100), 179, 174, 171, 161, 142, 137           |
| C <sub>13</sub> H <sub>14</sub> O <sub>5</sub>                               | Pexp_251.091_21.70       | 251.09108                          | 264.13455                          | 258.11474                                           | 251→ 233(100), 215, 198, 167, 143                     |
| C <sub>15</sub> H <sub>18</sub> N <sub>2</sub>                               | Pexp_227.155_6.44        | 227.15514                          | 242.20521                          | 237.17554                                           | 227→ 210(100), 198, 171, 154, 130                     |
| C <sub>15</sub> H <sub>19</sub> NO <sub>6</sub>                              | Pexp_310.129_12.78       | 310.12939                          | 325.17984                          | 319.15312                                           | 310→ 292 (100), 264, 240, 186, 158, 140, 107          |
| C <sub>15</sub> H <sub>19</sub> NO <sub>6</sub>                              | Pexp_310.129_14.80       | 310.12964                          | 325.17835                          | 319.14477                                           | 310→ 292 (100), 264, 240, 185, 158, 140, 107          |
| C <sub>15</sub> H <sub>20</sub> O <sub>4</sub>                               | Pexp_265.144_15.91       | 265.14412                          | 280.19431                          | 273.17072                                           | 265→ 247, 229, 219(100), 205, 201, 191, 151, 135, 107 |
| C <sub>15</sub> H <sub>20</sub> O <sub>4</sub>                               | Pexp_265.144_16.91       | 265.14410                          | 280.19364                          | 273.17064                                           | 265→ 247, 229, 219(100), 205, 201, 191 151, 135, 107  |
| C <sub>15</sub> H <sub>20</sub> O <sub>4</sub>                               | Pexp_265.144_18.49       | 265.14415                          | 280.19430                          | 273.17081                                           | 265→ 247, 229, 219(100), 205, 201, 191 151, 135, 107  |
| C <sub>15</sub> H <sub>20</sub> O <sub>4</sub>                               | Pexp_265.144_19.35       | 265.14414                          | 280.19429                          | 273.17082                                           | 265→ 247, 229, 219(100), 205, 201, 191 151, 135, 107  |
| C <sub>16</sub> H <sub>18</sub> N <sub>2</sub> O <sub>2</sub>                | Pexp_271.144_7.62        | 271.14496                          | 287.19861                          | 281.16599                                           | 271→ 254(100), 225, 215, 168                          |
| C <sub>16</sub> H <sub>18</sub> N <sub>2</sub> O <sub>2</sub>                | Pexp_271.144_8.45        | 271.14467                          | 287.19873                          | 281.16576                                           | 271→ 254(100), 225, 215, 168                          |
| C <sub>16</sub> H <sub>26</sub> N <sub>2</sub> O <sub>4</sub> S <sub>2</sub> | Pexp_375.142_22.02       | 375.14202                          | 391.19584                          | 385.16297                                           | 375→ 357, 347, 222, 178, 154(100),                    |
| C <sub>17</sub> H <sub>22</sub> O <sub>5</sub>                               | Pexp_307.154_27.39       | 307.15471                          | 324.21155                          | 316.18482                                           | 307→ 265(100), 247, 229, 219, 211, 201, 135           |
| C <sub>17</sub> H <sub>22</sub> O <sub>5</sub>                               | Pexp_307.155_30.19       | 307.15504                          | 324.21163                          | 316.18515                                           | 307→ 265(100), 247, 229, 219, 211, 201, 135           |
| C <sub>18</sub> H <sub>16</sub> N <sub>2</sub> O <sub>2</sub>                | Pexp_293.129_13.58       | 293.12911                          | 311.18978                          | 305.15587                                           | 293→ 265(100), 248, 237, 222, 120                     |
| C <sub>18</sub> H <sub>16</sub> N <sub>2</sub> O <sub>2</sub>                | Pexp_293.129_17.74       | 293.12915                          | 311.18970                          | 305.15668                                           | 293→ 265(100), 248, 237, 222, 120                     |
| C <sub>18</sub> H <sub>16</sub> N <sub>2</sub> O <sub>3</sub>                | Pexp_309.124_14.76       | 309.12421                          | 327.18455                          | 320.14798                                           | 309→ 292 (100), 267, 249, 231                         |

|                                                               |                           |                  |                  |                  |                                                            |
|---------------------------------------------------------------|---------------------------|------------------|------------------|------------------|------------------------------------------------------------|
| C <sub>18</sub> H <sub>18</sub> N <sub>2</sub> O <sub>2</sub> | Pexp_295.144_14.61        | 295.14479        | 313.20540        | 307.17251        | 295→ 267(100), 250, 239, 222, 120                          |
| C <sub>18</sub> H <sub>31</sub> NO <sub>7</sub>               | Pexp_374.216_23.72        | 374.21663        | 392.27652        | 385.24644        | 374→ 356(100), 204, 186, 158                               |
| C <sub>19</sub> H <sub>16</sub> N <sub>2</sub> O <sub>2</sub> | Pexp_305.129_32.50        | 305.12911        | 324.19310        | 316.15289        | 305→ 277(100), 264, 262, 205, 187                          |
| C <sub>19</sub> H <sub>16</sub> N <sub>2</sub> O <sub>2</sub> | Pexp_305.129_33.17        | 305.12933        | 324.19301        | 317.15701        | 305→ 277(100), 264, 262, 205, 187                          |
| C <sub>19</sub> H <sub>16</sub> N <sub>2</sub> O <sub>4</sub> | Pexp_337.119_13.73        | 337.11909        | 356.18283        | 349.14659        | 337→ 319, 309(100), 296, 294, 280, 252, 237, 203, 121      |
| C <sub>19</sub> H <sub>16</sub> N <sub>2</sub> O <sub>4</sub> | Pexp_337.119_15.20        | 337.11916        | 356.18294        | 349.14676        | 337→ 319, 309(100), 296, 280, 237, 203, 121                |
| C <sub>19</sub> H <sub>21</sub> NO <sub>7</sub>               | Pexp_376.139_17.45        | 376.13901        | 395.20280        | 387.16962        | 376→ 233, 207(100), 189                                    |
| C <sub>19</sub> H <sub>21</sub> NO <sub>7</sub>               | Pexp_376.139_18.65        | 376.13904        | 395.20262        | 387.16966        | 376→ 233, 207(100), 189                                    |
| <b>C<sub>19</sub>H<sub>38</sub>O<sub>6</sub></b>              | <b>Pexp_361.258_37.23</b> | <b>361.25871</b> | <b>380.32251</b> | <b>371.29242</b> | <b>361→ 343, 325, 283, 273, 257(100), 157</b>              |
| <b>C<sub>19</sub>H<sub>38</sub>O<sub>6</sub></b>              | <b>Pexp_361.258_38.19</b> | <b>361.25819</b> | <b>380.32253</b> | <b>371.29252</b> | <b>361→ 343, 325, 299, 283, 257(100), 157</b>              |
| C <sub>20</sub> H <sub>18</sub> N <sub>2</sub> O <sub>2</sub> | Pexp_319.145_35.48        | 319.14588        | 339.21182        | 332.17585        | 319→ 291(100), 278, 262, 250, 234, 205, 201, 188, 132      |
| C <sub>20</sub> H <sub>18</sub> N <sub>2</sub> O <sub>2</sub> | Pexp_319.145_36.44        | 319.14502        | 339.21173        | 332.17596        | 319→ 291(100), 278, 260, 250, 234, 205, 201, 188, 160, 132 |
| C <sub>20</sub> H <sub>21</sub> NO <sub>9</sub>               | Pexp_420.128_18.38        | 420.12857        | 440.19571        | 432.16272        | 420→ 251(100), 233                                         |
| C <sub>20</sub> H <sub>21</sub> NO <sub>9</sub>               | Pexp_420.128_21.20        | 420.12858        | 440.19605        | 432.16318        | 420→ 251(100), 233                                         |
| C <sub>20</sub> H <sub>26</sub> O <sub>8</sub>                | Pexp_395.171_13.61        | 395.17142        | 415.23827        | 406.20763        | 395→ 251(100), 233                                         |
| C <sub>22</sub> H <sub>23</sub> N <sub>5</sub> O <sub>2</sub> | Pexp_390.193_15.09        | 390.19390        | 412.26737        | 406.21627        | 390→ 334, 322(100), 198, 193                               |
| C <sub>22</sub> H <sub>25</sub> N <sub>5</sub> O <sub>2</sub> | Pexp_392.209_9.99         | 392.20913        | 414.28326        | 408.22845        | 392→ 336, 324(100), 198, 195                               |
| C <sub>23</sub> H <sub>24</sub> N <sub>2</sub> O <sub>6</sub> | Pexp_425.171_26.92        | 425.17179        | 448.24874        | 439.20611        | 425→ 407, 383, 365, 288(100), 260                          |
| <b>C<sub>24</sub>H<sub>26</sub>N<sub>2</sub>O<sub>6</sub></b> | <b>Pexp_437.170_33.79</b> | <b>437.17091</b> | <b>461.25116</b> | <b>451.20575</b> | <b>437→ 395, 377(100), 333, 286</b>                        |
| C <sub>26</sub> H <sub>30</sub> N <sub>4</sub>                | Pexp_399.255_19.94        | 399.25568        | 425.34268        | 417.29076        | 399→ 382, 365, 241(100), 224, 185, 159, 144, 130           |
| C <sub>26</sub> H <sub>30</sub> N <sub>4</sub> O              | Pexp_415.250_14.62        | 415.25034        | 441.33736        | 433.28593        | 415→ 398, 357, 343, 257(100), 240, 199, 185, 159           |
| C <sub>26</sub> H <sub>30</sub> N <sub>4</sub> O              | Pexp_415.250_18.43        | 415.25033        | 441.33739        | 433.28576        | 415→ 397, 257(100), 240, 228, 224, 201, 159, 130           |
| C <sub>26</sub> H <sub>40</sub> O <sub>6</sub>                | Pexp_449.289_29.93        | 449.28939        | 475.37674        | 463.33658        | 449→ 431(100), 386, 384, 221, 211, 203, 179, 166           |
| C <sub>27</sub> H <sub>30</sub> N <sub>4</sub> O <sub>2</sub> | Pexp_443.245_15.65        | 443.24564        | 470.33554        | 461.28105        | 443→ 385, 371(100), 201, 185, 171, 154                     |
| C <sub>28</sub> H <sub>30</sub> N <sub>4</sub> O <sub>3</sub> | Pexp_471.239_19.56        | 471.23997        | 499.33402        | 490.27887        | 471→ 399, 371, 201, 199(100), 171, 159, 154                |
| C <sub>28</sub> H <sub>31</sub> N <sub>5</sub> O <sub>5</sub> | Pexp_518.241_16.36        | 518.24108        | 546.33497        | 538.27672        | 518→ 500, 462, 450(100), 321                               |
| C <sub>28</sub> H <sub>31</sub> N <sub>5</sub> O <sub>5</sub> | Pexp_518.240_17.21        | 518.24092        | 546.33488        | 538.27706        | 518→ 500, 462, 450(100), 402, 390, 326, 210                |
| C <sub>28</sub> H <sub>32</sub> N <sub>4</sub> O              | Pexp_441.265_17.14        | 441.26589        | 469.35970        | 460.30445        | 441→ 424(100), 385, 365, 239, 224, 185, 183                |



|                                                               |                           |                  |                  |                  |                                                                                     |
|---------------------------------------------------------------|---------------------------|------------------|------------------|------------------|-------------------------------------------------------------------------------------|
| C <sub>28</sub> H <sub>32</sub> N <sub>4</sub> O <sub>2</sub> | Pexp_457.260_14.27        | 457.26097        | 485.35452        | 476.29968        | 457→ 440(100), 385, 257,255, 240, 210, 201, 185                                     |
| C <sub>28</sub> H <sub>32</sub> N <sub>4</sub> O <sub>2</sub> | Pexp_457.260_14.97        | 457.26095        | 485.35394        | 476.29996        | 457→ 439, 385(100), 239, 185                                                        |
| C <sub>28</sub> H <sub>32</sub> N <sub>4</sub> O <sub>2</sub> | Pexp_457.261_23.65        | 457.26116        | 485.35429        | 476.29971        | 457→ 399, 385(100), 201, 185, 159, 144, 130                                         |
| C <sub>28</sub> H <sub>32</sub> N <sub>4</sub> O <sub>3</sub> | Pexp_473.255_15.50        | 473.25566        | 501.34996        | 492.29429        | 473→ 456(100), 401, 397, 273, 271, 253, 244, 201, 199, 171                          |
| C <sub>28</sub> H <sub>36</sub> N <sub>4</sub> O <sub>4</sub> | Pexp_493.279_31.47        | 493.27971        | 521.37363        | 511.31495        | -                                                                                   |
| C <sub>28</sub> H <sub>38</sub> N <sub>4</sub> O <sub>5</sub> | Pexp_511.290_18.01        | 511.29099        | 539.38447        | 529.32631        | 511→ 493, 465, 394, 346, 301, 265(100), 247, 219, 166                               |
| C <sub>28</sub> H <sub>38</sub> N <sub>4</sub> O <sub>6</sub> | Pexp_527.287_12.46        | 527.28755        | 555.38184        | 545.32412        | 527→ 281(100), 509, 481, 346, 301, 265, 247, 219, 182                               |
| <b>C<sub>28</sub>H<sub>38</sub>O<sub>7</sub></b>              | <b>Pexp_485.254_35.32</b> | <b>485.25405</b> | <b>513.34696</b> | <b>500.30389</b> | <b>485→ 470, 457, 453(100), 425, 411, 409, 393</b>                                  |
| C <sub>28</sub> H <sub>38</sub> O <sub>7</sub>                | Pexp_487.270_36.21        | 487.27063        | 515.36381        | 502.32065        | 487→ 427(100), 409, 395, 377, 243                                                   |
| <b>C<sub>28</sub>H<sub>38</sub>O<sub>8</sub></b>              | <b>Pexp_501.247_27.70</b> | <b>501.24792</b> | <b>529.34203</b> | <b>516.29846</b> | <b>501→ 457, 441(100), 425, 410, 397, 373, 365,</b>                                 |
| <b>C<sub>28</sub>H<sub>38</sub>O<sub>8</sub></b>              | <b>Pexp_501.247_28.44</b> | <b>501.24792</b> | <b>529.34203</b> | <b>516.29846</b> | <b>501→ 457, 441(100), 425, 410, 397, 373, 365,</b>                                 |
| <b>C<sub>28</sub>H<sub>38</sub>O<sub>8</sub></b>              | <b>Pexp_501.247_29.57</b> | <b>501.24786</b> | <b>529.34194</b> | <b>516.29974</b> | <b>501→ 486, 469, 457, 441(100), 425, 397, 373, 366</b>                             |
| <b>C<sub>28</sub>H<sub>40</sub>O<sub>6</sub></b>              | <b>Pexp_471.274_39.48</b> | <b>471.27434</b> | <b>499.36727</b> | <b>486.32419</b> | <b>471→ 456, 439, 411(100)</b>                                                      |
| <b>C<sub>28</sub>H<sub>40</sub>O<sub>7</sub></b>              | <b>Pexp_487.268_30.58</b> | <b>487.26898</b> | <b>515.36247</b> | <b>502.31903</b> | <b>487→ 455, 427(100), 411, 395, 351,336</b>                                        |
| C <sub>29</sub> H <sub>33</sub> N <sub>5</sub> O <sub>6</sub> | Pexp_548.251_15.42        | 548.25180        | 577.34902        | 568.28775        | 548→ 530, 518, 492, 480(100), 462, 402, 390, 356                                    |
| C <sub>30</sub> H <sub>36</sub> N <sub>4</sub> O <sub>2</sub> | Pexp_485.292_16.36        | 485.29245        | 515.39378        | 505.33425        | 485→ 468(100), 429, 365, 239, 224. 222, 183, 185, 159, 144                          |
| C <sub>31</sub> H <sub>36</sub> N <sub>4</sub> O <sub>2</sub> | Pexp_497.290_31.66        | 497.29061        | 528.39421        | 517.33225        | 497→ 479, 425(100), 439, 257, 241, 185, 168, 159                                    |
| C <sub>32</sub> H <sub>34</sub> N <sub>4</sub> O <sub>3</sub> | Pexp_523.271_31.84        | 523.27152        | 555.37917        | 543.30477        | 523→ 451, 423(100), 253, 199, 171, 159, 154,                                        |
| C <sub>32</sub> H <sub>36</sub> N <sub>2</sub> O <sub>4</sub> | Pexp_513.276_39.10        | 513.27635        | 545.38309        | 532.32773        | 513→ 495(100), 477, 455, 430, 412, 384, 366, 250                                    |
| C <sub>32</sub> H <sub>36</sub> N <sub>2</sub> O <sub>5</sub> | Pexp_529.270_25.21        | 529.27058        | 561.37837        | 548.32196        | 529→ 511(100), 493, 475, 382, 380, 362, 307, 185                                    |
| C <sub>32</sub> H <sub>36</sub> N <sub>2</sub> O <sub>5</sub> | Pexp_529.270_26.71        | 529.27029        | 561.37834        | 548.32343        | 529→ 511(100), 493, 475, 382, 380, 362, 185                                         |
| C <sub>32</sub> H <sub>36</sub> N <sub>2</sub> O <sub>5</sub> | Pexp_529.270_30.51        | 529.27077        | 561.37872        | 548.32190        | 529→ 511(100), 493, 469, 475, 483, 457, 451, 359, 333                               |
| C <sub>32</sub> H <sub>36</sub> N <sub>2</sub> O <sub>5</sub> | Pexp_529.270_33.98        | 529.27067        | 561.37843        | 548.32208        | 529→ 511(100), 501, 493, 483, 475, 465, 457, 431, 417, 400, 382                     |
| C <sub>32</sub> H <sub>36</sub> N <sub>2</sub> O <sub>5</sub> | Pexp_529.270_35.67        | 529.27092        | 561.37735        | 548.31076        | 529→ 511 (100), 493, 469, 382, 359, 331                                             |
| C <sub>32</sub> H <sub>36</sub> N <sub>2</sub> O <sub>5</sub> | Pexp_529.270_36.41        | 529.27063        | 561.37820        | 548.32186        | 529→ 511(100), 493, 487, 483, 475, 469, 457, 400, 398, 382, 380, 364, 328, 310, 185 |
| C <sub>32</sub> H <sub>36</sub> N <sub>2</sub> O <sub>5</sub> | Pexp_529.270_37.41        | 529.27056        | 561.37807        | 548.32181        | 529→511 (100), 493, 453, 380, 327, 185                                              |
| <b>C<sub>32</sub>H<sub>36</sub>N<sub>2</sub>O<sub>6</sub></b> | <b>Pexp_543.248_34.05</b> | <b>543.24836</b> | <b>575.35597</b> | <b>562.29931</b> | <b>543→ 499, 481, 471, 445(100), 427, 375, 352, 248</b>                             |

|                                                               |                           |                  |                  |                  |                                                                                 |
|---------------------------------------------------------------|---------------------------|------------------|------------------|------------------|---------------------------------------------------------------------------------|
| <b>C<sub>32</sub>H<sub>36</sub>N<sub>4</sub>O<sub>2</sub></b> | <b>Pexp_509.292_36.01</b> | <b>509.29257</b> | <b>541.39875</b> | <b>530.3376</b>  | <b>509→ 437(100), 451, 185</b>                                                  |
| <b>C<sub>32</sub>H<sub>36</sub>N<sub>4</sub>O<sub>3</sub></b> | <b>Pexp_525.287_13.45</b> | <b>525.28735</b> | <b>557.39329</b> | <b>546.33239</b> | <b>525→ 507, 481, 467, 453(100), 409, 343, 340, 257, 240,225, 199, 185, 159</b> |
| <b>C<sub>32</sub>H<sub>36</sub>N<sub>4</sub>O<sub>3</sub></b> | <b>Pexp_525.287_27.91</b> | <b>525.28705</b> | <b>557.39461</b> | <b>546.33215</b> | <b>525→ 508(100), 271, 273, 199</b>                                             |
| <b>C<sub>32</sub>H<sub>38</sub>N<sub>4</sub>O<sub>2</sub></b> | <b>Pexp_511.306_36.13</b> | <b>511.30684</b> | <b>543.41590</b> | <b>532.35205</b> | <b>511→ 439(100), 453, 185, 144</b>                                             |
| <b>C<sub>32</sub>H<sub>38</sub>N<sub>4</sub>O<sub>3</sub></b> | <b>Pexp_527.303_21.41</b> | <b>527.30304</b> | <b>559.41082</b> | <b>548.34834</b> | <b>527→ 509, 469, 453, 437(100), 275, 215</b>                                   |
| <b>C<sub>32</sub>H<sub>38</sub>N<sub>4</sub>O<sub>4</sub></b> | <b>Pexp_543.297_19.36</b> | <b>543.29789</b> | <b>575.40330</b> | <b>564.34345</b> | <b>543→ 525, 485, 471(100), 185, 168</b>                                        |
| <b>C<sub>32</sub>H<sub>40</sub>N<sub>4</sub>O<sub>2</sub></b> | <b>Pexp_513.322_36.57</b> | <b>513.32227</b> | <b>545.43031</b> | <b>533.36211</b> | <b>513→ 495, 455, 441(100), 257, 185</b>                                        |
| <b>C<sub>33</sub>H<sub>38</sub>N<sub>4</sub>O<sub>5</sub></b> | <b>Pexp_571.293_18.22</b> | <b>571.29324</b> | <b>604.40405</b> | <b>592.33802</b> | <b>571→ 553, 513, 499(100), 455, 397, 299</b>                                   |
| <b>C<sub>37</sub>H<sub>42</sub>N<sub>4</sub>O<sub>5</sub></b> | <b>Pexp_623.325_29.52</b> | <b>623.32511</b> | <b>660.44909</b> | <b>646.37781</b> | <b>623→ 565, 551(100), 507, 449, 437, 371, 354, 299</b>                         |

**In bold** the compounds detected by negative electrospray ionization (ESI-). a Secondary metabolites identifier (Pexp\_*m/z*\_RT). *m/z* = *m/z* ratio and RT= retention time.

**Supplementary Table 2.** MS/MS spectra of the specific secondary metabolites only detected in the null mutant *PeΔbrlA* strain after culture on labeled wheat grains.

| Molecular formula                                             | Identifier <sup>a</sup> | <sup>12</sup> C <i>m/z</i><br>(Da) | <sup>13</sup> C <i>m/z</i><br>(Da) | <sup>13</sup> C/ <sup>15</sup> N <i>m/z</i><br>(Da) | <i>m/z</i> of major fragment ions                                                   |
|---------------------------------------------------------------|-------------------------|------------------------------------|------------------------------------|-----------------------------------------------------|-------------------------------------------------------------------------------------|
| C <sub>17</sub> H <sub>23</sub> N <sub>3</sub> O <sub>3</sub> | Pexp_318.179_03.12      | 318.17943                          | 335.23746                          | 330.20149                                           | 318→ 301(100), 272, 258, 205, 188, 178, 170, 159, 132                               |
| C <sub>17</sub> H <sub>23</sub> N <sub>3</sub> O <sub>3</sub> | Pexp_318.180_25.05      | 318.18043                          | 335.23716                          | 330.20173                                           | 318→ 300, 272, 205(100), 188, 159, 141, 132                                         |
| C <sub>18</sub> H <sub>35</sub> N <sub>3</sub> O <sub>4</sub> | Pexp_358.269_0.354      | 358.26901                          | 376.32935                          | 370.29051                                           | 358→ 340, 227(100), 199                                                             |
| C <sub>19</sub> H <sub>20</sub> O <sub>5</sub>                | Pexp_329.137_33.29      | 329.13738                          | 348.20079                          | 339.17092                                           | 329→ 311(100), 293, 285, 269, 258, 241, 229, 205, 177, 161                          |
| C <sub>26</sub> H <sub>32</sub> O <sub>8</sub>                | Pexp_473.215_9.67       | 473.21511                          | 499.30281                          | 487.26381                                           | -                                                                                   |
| C <sub>26</sub> H <sub>32</sub> O <sub>8</sub>                | Pexp_473.215_10.64      | 473.21552                          | 499.30112                          | 487.26454                                           | -                                                                                   |
| C <sub>26</sub> H <sub>32</sub> O <sub>8</sub>                | Pexp_473.214_34.14      | 473.21489                          | 499.29541                          | 487.25368                                           | -                                                                                   |
| C <sub>27</sub> H <sub>29</sub> N <sub>5</sub> O <sub>4</sub> | Pexp_488.227_10.8       | 488.22783                          | 515.30922                          | 507.26058                                           | 488→ 470(100), 458, 420, 402, 390, 322                                              |
| C <sub>27</sub> H <sub>29</sub> N <sub>5</sub> O <sub>4</sub> | Pexp_488.227_11.3       | 488.22766                          | 515.31807                          | 507.26066                                           | 488→ 470(100), 458, 420, 402, 390, 375, 322                                         |
| C <sub>29</sub> H <sub>27</sub> N <sub>5</sub> O <sub>5</sub> | Pexp_526.206_15.7       | 526.20693                          | 555.30405                          | 546.24399                                           | 526→ 508, 498, 458(100), 442, 430, 412, 390, 374, 334, 322, 216, 193                |
| C <sub>29</sub> H <sub>27</sub> N <sub>5</sub> O <sub>5</sub> | Pexp_526.206_17.61      | 526.20689                          | 555.29234                          | 546.24884                                           | 526→ 508, 498, 480, 470, 458(100), 390, 334, 322, 204, 192                          |
| C <sub>29</sub> H <sub>31</sub> N <sub>5</sub> O <sub>5</sub> | Pexp_530.238_14.83      | 530.23837                          | 559.33601                          | 550.27623                                           | 530→ 512, 468, 462, 390(100), 338, 322, 276, 252, 208, 193                          |
| C <sub>29</sub> H <sub>31</sub> N <sub>5</sub> O <sub>5</sub> | Pexp_530.238_15.85      | 530.23812                          | 559.33514                          | 550.27487                                           | 530→ 512, 474, 468, 462, 390(100), 338, 322, 276, 193                               |
| C <sub>29</sub> H <sub>31</sub> N <sub>5</sub> O <sub>5</sub> | Pexp_530.238_16.68      | 530.23840                          | 559.33720                          | 550.27338                                           | 530→ 512, 474, 462(100), 402, 390, 338, 320, 270, 210, 193                          |
| C <sub>29</sub> H <sub>33</sub> N <sub>5</sub> O <sub>6</sub> | Pexp_548.248_11.36      | 548.24883                          | 577.34601                          | 568.28444                                           | 548→ 530, 504, 480, 474(100), 390, 356, 322, 263, 193                               |
| C <sub>29</sub> H <sub>33</sub> N <sub>5</sub> O <sub>6</sub> | Pexp_548.248_12.14      | 548.24860                          | 577.34575                          | 568.28418                                           | 548→ 530, 518, 480, 474(100), 468, 402, 390, 356, 322                               |
| C <sub>32</sub> H <sub>36</sub> N <sub>2</sub> O <sub>5</sub> | Pexp_529.268_23.19      | 529.26807                          | 561.37549                          | 548.32110                                           | 529→ 511(100), 493, 486, 465, 431, 417, 403, 380, 349, 331, 292, 185, 167, 159      |
| C <sub>32</sub> H <sub>36</sub> N <sub>2</sub> O <sub>5</sub> | Pexp_529.268_32.43      | 529.26807                          | 561.37583                          | 548.3197                                            | 529→ 511(100), 501, 493, 483, 475, 429, 411, 398, 382, 362, 327, 185                |
| C <sub>32</sub> H <sub>36</sub> N <sub>2</sub> O <sub>5</sub> | Pexp_529.268_35.49      | 529.26769                          | 561.37490                          | 548.31990                                           | 529→ 511(100), 493, 483, 475, 471, 465, 455, 417, 380, 362, 347, 327, 319, 185, 167 |
| C <sub>32</sub> H <sub>36</sub> N <sub>2</sub> O <sub>6</sub> | Pexp_545.262_29.23      | 545.26241                          | 577.37065                          | 564.31731                                           | -                                                                                   |
| C <sub>32</sub> H <sub>36</sub> N <sub>2</sub> O <sub>6</sub> | Pexp_545.262_30.57      | 545.26288                          | 577.36827                          | 564.31312                                           | 545→ 527(100), 509, 491, 481, 463, 449, 429, 411, 396, 360, 185                     |
| C <sub>32</sub> H <sub>36</sub> N <sub>2</sub> O <sub>6</sub> | Pexp_545.262_31.50      | 545.26281                          | 577.36975                          | 564.31459                                           | -                                                                                   |
| C <sub>32</sub> H <sub>36</sub> N <sub>2</sub> O <sub>6</sub> | Pexp_545.262_32.48      | 545.26294                          | 577.36998                          | 564.31425                                           | 545→ 527(100), 509, 499, 491, 473, 445, 427, 365, 363, 345, 184                     |
| C <sub>32</sub> H <sub>38</sub> N <sub>2</sub> O <sub>5</sub> | Pexp_531.283_21.75      | 531.28384                          | 563.39083                          | 550.33694                                           | 531→ 513(100), 495, 477, 459, 429, 411, 397, 384, 313, 295, 267, 185                |
| C <sub>32</sub> H <sub>38</sub> N <sub>2</sub> O <sub>5</sub> | Pexp_531.284_23.91      | 531.28431                          | 563.39246                          | 549.33473                                           | 531→ 513(100), 495, 477, 455, 397, 371, 331, 185, 165                               |
| C <sub>32</sub> H <sub>38</sub> N <sub>2</sub> O <sub>5</sub> | Pexp_531.283_28.02      | 531.28354                          | 563.39229                          | 550.33654                                           | 531→ 513(100), 495, 477, 485, 471, 467, 459, 445, 431, 399, 364, 331, 185           |
| C <sub>32</sub> H <sub>38</sub> N <sub>2</sub> O <sub>5</sub> | Pexp_531.283_28.52      | 531.28340                          | 563.39080                          | 549.32886                                           | 531→ 513(100), 495, 477, 449, 413, 397, 371, 331, 309, 185, 165                     |
| C <sub>32</sub> H <sub>38</sub> N <sub>2</sub> O <sub>5</sub> | Pexp_531.283_31.56      | 531.28338                          | 563.39064                          | 550.33378                                           | 531→ 513(100), 495, 485, 477, 467, 459, 455, 384, 349, 331, 185                     |

|                                                               |                    |           |           |           |                                                       |
|---------------------------------------------------------------|--------------------|-----------|-----------|-----------|-------------------------------------------------------|
| C <sub>32</sub> H <sub>38</sub> N <sub>2</sub> O <sub>6</sub> | Pexp_547.278_23.19 | 547.27864 | 579.38570 | 566.32988 | 547→ 529(100), 511, 493, 483, 465, 349, 185           |
| C <sub>32</sub> H <sub>38</sub> N <sub>2</sub> O <sub>6</sub> | Pexp_547.278_25.47 | 547.27841 | 579.38548 | 566.32988 | 547→ 529(100), 511, 493, 483, 465, 417, 327, 185      |
| C <sub>32</sub> H <sub>38</sub> N <sub>2</sub> O <sub>6</sub> | Pexp_547.278_27.09 | 547.27842 | 579.38554 | 566.32965 | 547→ 529(100), 511, 493, 465, 483, 429, 475, 380, 185 |

<sup>a</sup> Secondary metabolite identifier (Pexp\_m/z\_Rt). m/z = m/z ratio and Rt= retention time.

**Supplementary Table 3.** Primers used in qPCR for analysis of putative chaetoglobosin gene clusters.

| Primer name    | Sequence               | Ratio (F/R)         |
|----------------|------------------------|---------------------|
| cheC_F         | GACCAACCTTGGCATATA     | 300/300             |
| cheC_R         | TCGTCGATCTGTATGTAGAC   |                     |
| cheB_F1        | TCAAATCCTCACGCTATCT    | 300/900             |
| cheB_R1        | GCATGTGGGAGACTGATA     |                     |
| cheA_F2        | GAAGTGGGTTGTGGTAATG    | 900/300             |
| cheA_R2        | CAGTAGATCCCTCCAATATGTA |                     |
| cheD_F1        | GAGGAACGCCTTCTGTAA     | 300/900             |
| cheD_R1        | GCGAGATGTTTGCACTTT     |                     |
| cheF_F2        | AACTGCTGAGAAGTTCA      | 900/900 and 900/300 |
| cheF_R2        | GTTGCGTATCTCATTACACC   |                     |
| cheG_F2        | CTCCAGCGATGGTTCCT      | 300/900             |
| cheG_R2        | GCCTTGGCTGGATGATTG     |                     |
| PEXP_073960_F2 | TCCATTCTCTTAGTCTAGTGAC | 900/900             |
| PEXP_073960_R2 | TTCAGATGCTGGTTAGGG     |                     |
| PEXP_073970_F1 | GGTGATTGTGCTGGTATTG    | 900/300             |
| PEXP_073970_R1 | GAGGTAGAAGTGGGTTTCAT   |                     |
| PEXP_073980_F1 | GAACAACCAGCCATTGAG     | 900/300             |
| PEXP_073980_R1 | GTTAGGATCGCGGTAGAA     |                     |
| PEXP_073990_F  | GAGACGGTCTCGTCTTTGG    | 300/300             |
| PEXP_073990_R  | ACACGATGGCCGAGAAG      |                     |
| PEXP_074000_F  | CCAACGTTGCTATCCA       | 300/300             |
| PEXP_074000_R  | TGCGGACCTTGGTAATG      |                     |
| PEXP_074010_F2 | GCCACAAACGACATTGA      | 300/900             |
| PEXP_074010_R2 | CGGAACAACACCAAGAG      |                     |
| PEXP_074020_F1 | GGAAGCCGATCAGGATAA     | 300/300             |
| PEXP_074020_R1 | GCTGGTCAGGACTAGTTG     |                     |
| PEXP_074030_F  | TGAAGTCCTCGAACCBA      | 300/900             |
| PEXP_074030_R  | TTTGCTTGTTTCAGGATGG    |                     |
| PEXP_074040_F1 | TCCTGTCGCCTCATTAT      | 900/300             |
| PEXP_074040_R1 | CACCGCTGTTCTTGATAG     |                     |
| PEXP_074050_F1 | CACTGACGAACCAGAAAG     | 300/300             |
| PEXP_074050_R1 | GTTGCACAGAGCGATAG      |                     |
| PEXP_074060_F2 | TAGAGTTGGGTCGTGGT      | 300/900             |
| PEXP_074060_R2 | CTCTCTCACTGTACATCTTGG  |                     |

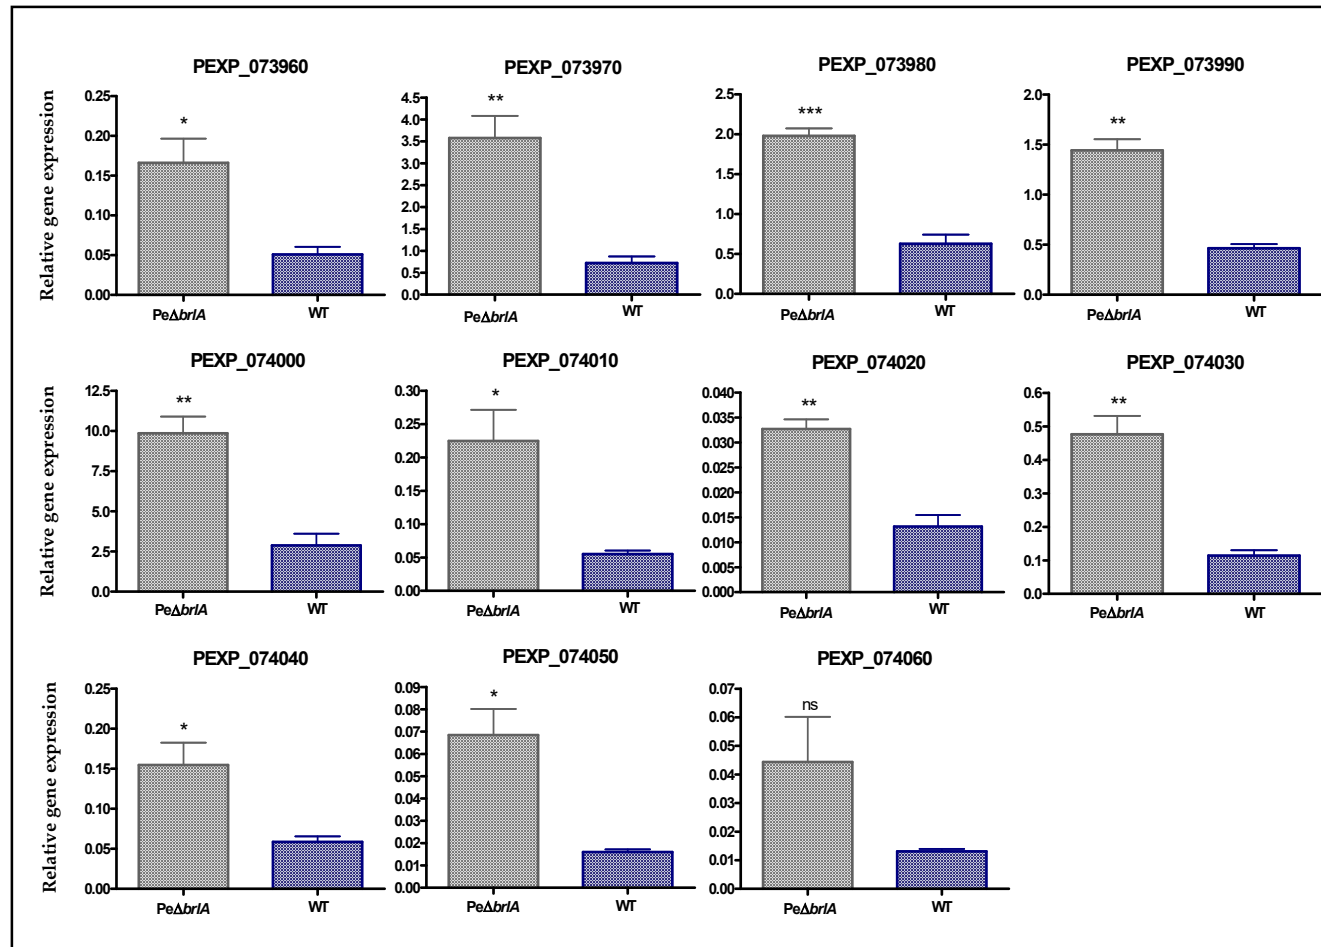

**Supplementary Figure 4.** Relative gene expression of the putative chaetoglobosin biosynthetic gene cluster (PEXP\_073960-PEXP\_074060) in *Penicillium expansum* wild type NRRL 35695 and the null mutant *PeΔbrlA* strains. The graphs show the mean  $\pm$  standard error of the mean (SEM) from three biological replicates and the significant differences between the wild type and the null mutant *PeΔbrlA* strains.  $p$ -value \* $< 0.05$ ; \*\* $< 0.01$ ; \*\*\* $< 0.001$ . ns = no significant.

**Supplementary Table 4.** *Penicillium expansum* genes orthologous to genes significantly down-regulated (Log<sub>2</sub> fold change < -3) in *Penicillium digitatum* PdΔbrlA strain [38].

| <i>Penicillium digitatum</i><br>PHI26 strain<br>Gene ID | <i>Penicillium digitatum</i><br>GenBank Accession<br>number | Log <sub>2</sub> Fold Change<br>PdΔbrlA Vs WT <sup>1</sup> * | % Positives | <i>Penicillium expansum</i><br>strain d1<br>Gene ID | Log <sub>2</sub> fold change<br>PeΔbrlA Vs WT <sup>2</sup> | Adjusted<br>p-value |
|---------------------------------------------------------|-------------------------------------------------------------|--------------------------------------------------------------|-------------|-----------------------------------------------------|------------------------------------------------------------|---------------------|
| GI:425772521                                            | EKV10922.1                                                  | -8.5                                                         | 98.07       | PEXP_097180                                         | -8.34                                                      | 1.13E-13            |
| GI:425776459                                            | EKV14676.1                                                  | -8.4                                                         | 92.95       | PEXP_020490                                         | -11.4                                                      | 1.43E-16            |
| GI:425767953                                            | EKV06503.1                                                  | -8.3                                                         | 81.25       | PEX2_067760                                         | ns                                                         | -                   |
| GI:425772520                                            | EKV10921.1                                                  | -8.1                                                         | 95.19       | PEXP_097170                                         | -8.64                                                      | 1.15E-15            |
| GI:425779884                                            | EKV17912.1                                                  | -7.9                                                         | 88.53       | PEXP_044610                                         | -6.44                                                      | 1.95E-03            |
| GI:425765865                                            | EKV04510.1                                                  | -7.6                                                         | 74.22       | PEXP_098690                                         | -10.6                                                      | 2.53E-18            |
| GI:425772463                                            | EKV10864.1                                                  | -7.2                                                         | 87.2        | PEXP_008790                                         | -6.68                                                      | 2.81E-14            |
| GI:425767228                                            | EKV05802.1                                                  | -7.0                                                         | ns          | -                                                   | -                                                          | -                   |
| GI:425769821                                            | EKV08303.1                                                  | -6.9                                                         | 93.79       | PEXP_020490                                         | -11.4                                                      | 1.43E-16            |
| GI:425781523                                            | EKV19483.1                                                  | -6.9                                                         | 80.16       | PEXP_033790                                         | -8.30                                                      | 8.53E-16            |
| GI:425775975                                            | EKV14214.1                                                  | -6.8                                                         | 86.77       | PEXP_062310                                         | -10.9                                                      | 7.29E-16            |
| GI:425773118                                            | EKV11490.1                                                  | -6.8                                                         | 92.02       | PEXP_001060                                         | -9.51                                                      | 1.43E-16            |
| GI:425776321                                            | EKV14543.1                                                  | -6.7                                                         | 84.95       | PEXP_075490                                         | -2                                                         | 6.55E-08            |
| GI:425770425                                            | EKV08898.1                                                  | -6.7                                                         | 93.33       | PEXP_052120                                         | -10.1                                                      | 8.09E-17            |
| GI:425775531                                            | EKV13796.1                                                  | -6.7                                                         | 98.43       | PEXP_049260                                         | -6.21                                                      | 1.07E-14            |
| GI:425770751                                            | EKV09215.1                                                  | -6.6                                                         | 91.34       | PEXP_004280                                         | ns                                                         | -                   |
| GI:425781932                                            | EKV19866.1                                                  | -6.6                                                         | 95.51       | PEXP_018490                                         | -10.7                                                      | 2.61E-16            |
| GI:425775976                                            | EKV14215.1                                                  | -6.5                                                         | 96.95       | PEXP_062290                                         | -13.0                                                      | 1.07E-18            |
| GI:425774025                                            | EKV12348.1                                                  | -6.5                                                         | 78.85       | PEXP_011470                                         | -7.65                                                      | 1.10E-14            |
| GI:425765801                                            | EKV04449.1                                                  | -6.5                                                         | 87.60       | PEXP_074900                                         | -7.92                                                      | 1.14E-14            |
| GI:425779486                                            | EKV17537.1                                                  | -6.4                                                         | 97.28       | PEXP_000200                                         | -5.57                                                      | 3.94E-13            |
| GI:425774428                                            | EKV12735.1                                                  | -6.4                                                         | 66.67       | PEXP_014810                                         | -6.15                                                      | 8.11E-15            |
| GI:425773468                                            | EKV11821.1                                                  | -6.3                                                         | 62.31       | PEXP_108060                                         | -8.35                                                      | 1.14E-14            |
| GI:425769509                                            | EKV08001.1                                                  | -6.3                                                         | 97.23       | PEXP_027310                                         | ns                                                         | -                   |

|              |            |      |       |             |       |          |
|--------------|------------|------|-------|-------------|-------|----------|
| GI:425775526 | EKV13791.1 | -6.2 | 96.63 | PEXP_049320 | -1.18 | 3.91E-07 |
| GI:425770516 | EKV08985.1 | -6.2 | 96.40 | PEXP_092210 | -4.28 | 1.47E-13 |
| GI:425781930 | EKV19864.1 | -6.1 | 95.29 | PEXP_018530 | -7.61 | 1.31E-15 |
| GI:425780307 | EKV18317.1 | -6.1 | 46.67 | -           | -     | -        |
| GI:425777761 | EKV15917.1 | -5.9 | 86.23 | PEXP_104370 | -4.56 | 1.23E-12 |
| GI:425767950 | EKV06500.1 | -5.8 | 96.39 | PEXP_098120 | -3.81 | 6.07E-10 |
| GI:425780304 | EKV18314.1 | -5.8 | 47.35 | -           | -     | -        |
| GI:425770152 | EKV08625.1 | -5.7 | 96.02 | PEXP_057120 | -3.38 | 9.46E-12 |
| GI:425772498 | EKV10899.1 | -5.7 | 86.47 | PEXP_096890 | -8.24 | 7.29E-16 |
| GI:425765867 | EKV04512.1 | -5.6 | 96.91 | PEXP_098720 | -1.92 | 8.61E-07 |
| GI:425777762 | EKV15918.1 | -5.6 | 91.55 | PEXP_104360 | -1.79 | 1.25E-10 |
| GI:425770173 | EKV08646.1 | -5.5 | 97.08 | PEXP_056860 | -4.96 | 1.58E-12 |
| GI:425771697 | EKV10134.1 | -5.5 | 89.82 | PEXP_046360 | -7.73 | 5.74E-14 |
| GI:425770151 | EKV08624.1 | -5.5 | 93.64 | PEXP_057120 | -3.38 | 9.46E-12 |
| GI:425775516 | EKV13783.1 | -5.4 | 96.38 | PEXP_049220 | -7.25 | 2.76E-13 |
| GI:425766389 | EKV05002.1 | -5.4 | 94.81 | PEXP_017260 | -6.11 | 2.85E-14 |
| GI:425780925 | EKV18916.1 | -5.4 | -     | -           | -     | -        |
| GI:425768899 | EKV07410.1 | -5.3 | 74.59 | PEXP_078920 | -8.16 | 8.83E-16 |
| GI:425781235 | EKV19211.1 | -5.3 | 63.40 | PEXP_041860 | -7.50 | 7.81E-14 |
| GI:425780308 | EKV18318.1 | -5.3 | 89.77 | PEXP_014270 | -5.36 | 5.20E-10 |
| GI:425773477 | EKV11830.1 | -5.2 | 92.33 | PEXP_108160 | -5.54 | 7.73E-14 |
| GI:425774331 | EKV12639.1 | -5.1 | 79.23 | PEXP_086170 | -6.03 | 2.26E-14 |
| GI:425778756 | EKV16861.1 | -5.1 | 88.37 | PEXP_041050 | -5.32 | 1.39E-09 |
| GI:425770554 | EKV09023.1 | -5.1 | 80.10 | PEXP_057440 | -4.27 | 2.05E-12 |
| GI:425772522 | EKV10923.1 | -5.0 | 97.00 | PEXP_097190 | -6.57 | 9.55E-13 |
| GI:425769933 | EKV08411.1 | -4.9 | 85.80 | PEXP_052780 | -2.45 | 2.26E-08 |
| GI:425777781 | EKV15937.1 | -4.9 | 96.22 | PEXP_104170 | ns    | -        |
| GI:425777125 | EKV15315.1 | -4.9 | 93.23 | PEXP_066390 | -5.00 | 2.02E-12 |
| GI:425770752 | EKV09216.1 | -4.9 | 96.82 | PEXP_004290 | ns    | -        |



|              |            |      |       |             |       |          |
|--------------|------------|------|-------|-------------|-------|----------|
| GI:425775661 | EKV13918.1 | -4.9 | 91.64 | PEXP_005290 | -2.08 | 5.13E-10 |
| GI:425769850 | EKV08332.1 | -4.9 | 71.97 | PEX1_062950 | -1.68 | 1.46E-08 |
| GI:425772518 | EKV10919.1 | -4.8 | 92.96 | PEXP_097110 | -6.57 | 1.58E-12 |
| GI:425777151 | EKV15335.1 | -4.7 | 87.87 | PEXP_053700 | ns    | -        |
| GI:425781931 | EKV19865.1 | -4.7 | 96.23 | PEXP_018520 | -7.46 | 1.93E-15 |
| GI:425770818 | EKV09278.1 | -4.7 | 77.76 | PEXP_031660 | -5.95 | 9.64E-12 |
| GI:425778273 | EKV16412.1 | -4.7 | 84.14 | PEXP_025000 | -8.34 | 6.10E-16 |
| GI:425781017 | EKV18999.1 | -4.6 | 93.04 | PEXP_072860 | -1.48 | 3.78E-06 |
| GI:425772484 | EKV10885.1 | -4.6 | 96.87 | PEXP_096630 | -12.2 | 6.41E-17 |
| GI:425768595 | EKV07113.1 | -4.4 | 93.65 | PEXP_077410 | -3.82 | 1.02E-10 |
| GI:425769499 | EKV07991.1 | -4.4 | 95.13 | PEXP_027120 | ns    | -        |
| GI:425767944 | EKV06494.1 | -4.4 | 55.56 | PEXP_017960 | ns    | -        |
| GI:425777763 | EKV15919.1 | -4.3 | 93.11 | PEXP_104360 | -1.79 | 1.25E-10 |
| GI:425777780 | EKV15936.1 | -4.3 | 91.90 | PEXP_104180 | ns    | -        |
| GI:425774443 | EKV12750.1 | -4.2 | 75.84 | PEXP_015010 | -9.46 | 1.59E-15 |
| GI:425775660 | EKV13917.1 | -4.2 | 74.88 | PEXP_005280 | ns    | -        |
| GI:425775572 | EKV13831.1 | -4.2 | 89.60 | PEXP_109570 | 2.13  | 1.18E-08 |
| GI:425779317 | EKV17384.1 | -4.2 | 99.16 | PEXP_006710 | -1.94 | 1.67E-10 |
| GI:425765863 | EKV04508.1 | -4.2 | 98.94 | PEXP_098670 | -6.02 | 3.39E-13 |
| GI:425765896 | EKV04537.1 | -4.1 | 98.09 | PEXP_011080 | -1.75 | 1.53E-09 |
| GI:425769807 | EKV08289.1 | -4.1 | 81.42 | PEXP_053340 | -5.41 | 6.44E-13 |
| GI:425775463 | EKV13732.1 | -4.1 | 93.61 | PEXP_101250 | -1.89 | 2.97E-10 |
| GI:425772050 | EKV10476.1 | -4.0 | 97.94 | PEXP_043320 | -5.62 | 5.94E-13 |
| GI:425770280 | EKV08753.1 | -4.0 | 94.29 | PEXP_050580 | 1.29  | 6.05E-06 |
| GI:425773857 | EKV12182.1 | -4.0 | 91.77 | PEXP_011880 | 1.37  | 3.96E-04 |
| GI:425770281 | EKV08754.1 | -4.0 | 94.50 | PEXP_050600 | 1.14  | 4.60E-07 |
| GI:425766239 | EKV04863.1 | -4.0 | 94.21 | PEXP_094000 | -5.22 | 4.79E-13 |
| GI:425770817 | EKV09277.1 | -3.9 | 92.31 | PEXP_031670 | -7.8  | 3.76E-15 |
| GI:425781867 | EKV19804.1 | -3.8 | 91.75 | PEXP_098500 | -1.55 | 1.81E-06 |

|              |            |      |       |             |       |          |
|--------------|------------|------|-------|-------------|-------|----------|
| GI:425768068 | EKV06612.1 | -3.7 | 90.29 | PEXP_054900 | -9.62 | 7.29E-16 |
| GI:425772896 | EKV11276.1 | -3.7 | 91.82 | PEXP_029020 | -3.62 | 4.07E-11 |
| GI:425773464 | EKV11817.1 | -3.6 | 78.31 | PEXP_108000 | ns    | -        |
| GI:425779318 | EKV17385.1 | -3.6 | 95.01 | PEXP_006700 | -4.51 | 5.43E-13 |
| GI:425777478 | EKV15650.1 | -3.6 | 92.00 | PEXP_060200 | -2.05 | 2.27E-08 |
| GI:425769811 | EKV08293.1 | -3.6 | 95.65 | PEXP_053400 | -5.65 | 7.21E-04 |
| GI:425773376 | EKV11732.1 | -3.5 | 92.58 | PEXP_108370 | -5.87 | 1.67E-13 |
| GI:425767550 | EKV06119.1 | -3.5 | 95.95 | PEXP_025390 | -7.18 | 8.81E-05 |
| GI:425775389 | EKV13661.1 | -3.5 | 95.48 | PEXP_101070 | -2.2  | 1.54E-08 |
| GI:425767941 | EKV06491.1 | -3.5 | 96.22 | PEXP_017870 | ns    | -        |
| GI:425775318 | EKV13596.1 | -3.3 | 93.79 | PEXP_048530 | -10.7 | 6.41E-17 |
| GI:425766258 | EKV04882.1 | -3.3 | 93.22 | PEXP_103160 | -7.8  | 1.41E-16 |
| GI:425771518 | EKV09959.1 | -3.3 | 96.73 | PEXP_045340 | -2.46 | 6.74E-10 |
| GI:425774860 | EKV13155.1 | -3.2 | 94.79 | PEXP_013330 | -1.13 | 4.40E-05 |
| GI:425770183 | EKV08656.1 | -3.2 | 94.21 | PEXP_056750 | -2.05 | 1.35E-07 |
| GI:425771298 | EKV09744.1 | -3.2 | ns    | -           | -     | -        |
| GI:425765581 | EKV04252.1 | -3.1 | 84.34 | PEXP_002300 | 1.01  | 4.37E-02 |
| GI:425768542 | EKV07063.1 | -3.1 | 92.55 | PEXP_039690 | ns    | -        |
| GI:425766255 | EKV04879.1 | -3.1 | 96.27 | PEXP_103220 | -2.74 | 3.12E-04 |
| GI:425770893 | EKV09353.1 | -3.0 | 95.65 | PEXP_030880 | ns    | -        |
| GI:425768940 | EKV07451.1 | -3.0 | 91.37 | PEXP_078340 | -5.64 | 7.41E-13 |
| GI:425775292 | EKV13570.1 | -3.0 | 83.98 | PEXP_048770 | ns    | -        |
| GI:425766211 | EKV04835.1 | -3.0 | 96.32 | PEXP_094330 | ns    | -        |
| GI:425772975 | EKV11353.1 | -3.0 | 95.79 | PEXP_029600 | -6.06 | 1.28E-05 |

<sup>1</sup>Pd $\Delta$ brlA = *Penicillium digitatum* null mutant  $\Delta$ brlA strain. WT = wild type *Penicillium digitatum* strain

<sup>2</sup>Pe $\Delta$ brlA = *Penicillium expansum* null mutant  $\Delta$ brlA strain. WT = wild type *Penicillium expansum* strain

\* These data are extracted from Wang *et al.* [38]

**Supplementary Table 5.** *Penicillium expansum* genes orthologous to genes significantly up-regulated (Log<sub>2</sub> fold change > 2) in *Penicillium digitatum* PdΔ*brlA* strain [38].

| <i>Penicillium digitatum</i><br>PHI26 strain<br>Gene ID | <i>Penicillium digitatum</i><br>GenBank Accession<br>number | Log <sub>2</sub> Fold Change<br>PdΔ <i>brlA</i> vs WT <sup>1</sup> * | % Positives | <i>Penicillium expansum</i><br>strain d1<br>Gene ID | Log <sub>2</sub> fold change<br>PeΔ <i>brlA</i> vs WT <sup>2</sup> | Adjusted<br><i>p</i> -value |
|---------------------------------------------------------|-------------------------------------------------------------|----------------------------------------------------------------------|-------------|-----------------------------------------------------|--------------------------------------------------------------------|-----------------------------|
| GI:425767861                                            | EKV06414.1                                                  | 2.0                                                                  | 96.04       | PEXP_023250                                         | ns                                                                 | -                           |
| GI:425770858                                            | EKV09318.1                                                  | 2.0                                                                  | 89.14       | PEXP_031240                                         | ns                                                                 | -                           |
| GI:425766441                                            | EKV05051.1                                                  | 2.0                                                                  | 79.37       | PEXP_016660                                         | ns                                                                 | -                           |
| GI:425774248                                            | EKV12561.1                                                  | 2.0                                                                  | 96.55       | PEXP_041510                                         | ns                                                                 | -                           |
| GI:425776778                                            | EKV14982.1                                                  | 2.0                                                                  | 95.27       | PEXP_105890                                         | 1.33                                                               | 7.88E-05                    |
| GI:425781020                                            | EKV19002.1                                                  | 2.1                                                                  | ns          | -                                                   | -                                                                  | -                           |
| GI:425774460                                            | EKV12767.1                                                  | 2.1                                                                  | 90.71       | PEXP_015220                                         | -1.20                                                              | 4.62E-03                    |
| GI:425772900                                            | EKV11280.1                                                  | 2.1                                                                  | 90.98       | PEXP_028970                                         | ns                                                                 | -                           |
| GI:425765571                                            | EKV04242.1                                                  | 2.1                                                                  | 98.53       | PEXP_002430                                         | 3.30                                                               | 4.21E-10                    |
| GI:425766130                                            | EKV04757.1                                                  | 2.2                                                                  | 96.62       | PEXP_080820                                         | 2.67                                                               | 1.27E-08                    |
| GI:425767714                                            | EKV06280.1                                                  | 2.2                                                                  | 92.37       | PEXP_068990                                         | -2.59                                                              | 8.77E-09                    |
| GI:425777056                                            | EKV15250.1                                                  | 2.2                                                                  | 95.53       | PEXP_066110                                         | ns                                                                 | -                           |
| GI:425770829                                            | EKV09289.1                                                  | 2.3                                                                  | 86.38       | PEXP_031560                                         | 1.13                                                               | 8.19E-05                    |
| GI:425768269                                            | EKV06797.1                                                  | 2.3                                                                  | 80.59       | PEXP_062990                                         | 2.63                                                               | 8.79E-10                    |
| GI:425767408                                            | EKV05982.1                                                  | 2.3                                                                  | 42.00       | -                                                   | -                                                                  | -                           |
| GI:425771110                                            | EKV09564.1                                                  | 2.3                                                                  | 92.49       | PEXP_106040                                         | ns                                                                 | -                           |
| GI:425776352                                            | EKV14572.1                                                  | 2.4                                                                  | 97.15       | PEXP_021430                                         | 1.86                                                               | 3.59E-08                    |
| GI:425771668                                            | EKV10105.1                                                  | 2.4                                                                  | 76.45       | PEXP_061820                                         | ns                                                                 | -                           |
| GI:425770387                                            | EKV08860.1                                                  | 2.5                                                                  | 88.07       | PEXP_051690                                         | ns                                                                 | -                           |
| GI:425769485                                            | EKV07977.1                                                  | 2.5                                                                  | 99.02       | PEXP_026950                                         | ns                                                                 | -                           |
| GI:425773099                                            | EKV11471.1                                                  | 2.6                                                                  | 94.55       | PEXP_000520                                         | 2.17                                                               | 1.09E-07                    |
| GI:425776932                                            | EKV15129.1                                                  | 2.6                                                                  | 93.18       | PEXP_065730                                         | -1.46                                                              | 1.78E-06                    |
| GI:425773150                                            | EKV11520.1                                                  | 2.6                                                                  | 85.53       | PEXP_099440                                         | ns                                                                 | -                           |
| GI:425765550                                            | EKV04227.1                                                  | 2.7                                                                  | 43.79       | -                                                   | -                                                                  | -                           |
| GI:425773151                                            | EKV11521.1                                                  | 2.7                                                                  | 95.00       | PEXP_099450                                         | ns                                                                 | -                           |
| GI:425767405                                            | EKV05979.1                                                  | 2.7                                                                  | ns          | -                                                   | -                                                                  | -                           |
| GI:425776933                                            | EKV15130.1                                                  | 2.7                                                                  | 97.41       | PEXP_065690                                         | 1.26                                                               | 7.42E-06                    |

|              |            |     |       |             |       |          |
|--------------|------------|-----|-------|-------------|-------|----------|
| GI:425779566 | EKV17613.1 | 2.7 | 95.06 | PEXP_054530 | ns    | -        |
| GI:425772465 | EKV10866.1 | 2.8 | 89.10 | PEXP_096290 | -2.51 | 4.85E-08 |
| GI:425765551 | EKV04228.1 | 2.8 | 47.10 | -           | -     | -        |
| GI:425771655 | EKV10092.1 | 2.9 | 94.68 | PEXP_061690 | ns    | -        |
| GI:425771656 | EKV10093.1 | 3.1 | 92.64 | PEXP_061700 | 2.53  | 9.23E-08 |
| GI:425777193 | EKV15377.1 | 3.2 | 94.44 | PEXP_069630 | 1.38  | 1.89E-04 |
| GI:425765774 | EKV04422.1 | 3.3 | 87.93 | PEXP_099150 | 1.36  | 3.45E-08 |
| GI:425777197 | EKV15381.1 | 3.4 | 97.60 | PEXP_070500 | ns    | -        |
| GI:425767246 | EKV05820.1 | 3.8 | 84.83 | PEXP_067100 | 1.38  | 1.94E-05 |
| GI:425776500 | EKV14717.1 | 3.9 | 89.10 | PEXP_021090 | ns    | -        |
| GI:425781626 | EKV19580.1 | 3.9 | 52.24 | -           | -     | -        |
| GI:425768677 | EKV07195.1 | 4.3 | 71.58 | PEXP_038390 | -2.11 | 5.06E-05 |
| GI:425781865 | EKV19802.1 | 4.3 | 92.66 | PEXP_098360 | 0.91  | 2.41E-03 |
| GI:425777310 | EKV15491.1 | 4.5 | 97.03 | PEXP_037440 | ns    | -        |
| GI:425780864 | EKV18860.1 | 4.5 | 95.00 | PEXP_071760 | ns    | -        |
| GI:425779404 | EKV17468.1 | 4.5 | 82.97 | PEXP_019000 | ns    | -        |
| GI:425775638 | EKV13895.1 | 4.6 | 67.95 | PEXP_102300 | ns    | -        |
| GI:425770813 | EKV09273.1 | 4.8 | 96.50 | PEXP_031710 | ns    | -        |
| GI:425781957 | EKV19891.1 | 6.3 | 95.43 | PEXP_018170 | ns    | -        |

<sup>1</sup>Pd $\Delta$ brlA = *Penicillium digitatum* null mutant  $\Delta$ brlA strain, WT = wild type *Penicillium digitatum* strain

<sup>2</sup>Pe $\Delta$ brlA = *Penicillium expansum* null mutant  $\Delta$ brlA strain, WT = wild type *Penicillium expansum* strain

\* These data are extracted from Wang *et al.* [38]

**Supplementary Table 6.** Eighteen orthologous genes similarly regulated to *wetA* in *Penicillium rubens*  $\Delta brlA$  [49] and *Penicillium expansum*  $\Delta brlA$ .

| <i>Penicillium expansum</i><br>strain d1<br>gene ID | <i>Penicillium rubens</i> strain<br>* Wisconsin 54-1255<br>gene ID | % Identity | Log <sub>2</sub> fold change<br>Pe $\Delta brlA$ vs WT | Adjusted<br><i>p</i> -value |
|-----------------------------------------------------|--------------------------------------------------------------------|------------|--------------------------------------------------------|-----------------------------|
| PEXP_022650                                         | Pc12g00920                                                         | 94.9       | -5.87                                                  | 6.90E-13                    |
| PEXP_052290                                         | Pc12g14760                                                         | 85.8       | -3.79                                                  | 3.17E-09                    |
| PEXP_041930                                         | Pc13g15970                                                         | 54.0       | -3.42                                                  | 3.41E-08                    |
| PEXP_056810                                         | Pc18g01100                                                         | 73.7       | -4.35                                                  | 2.83E-12                    |
| PEXP_084350                                         | Pc19g00410                                                         | 64.4       | -2.12                                                  | 1.90E-07                    |
| PEXP_096560                                         | Pc19g00420                                                         | 92.5       | -7.51                                                  | 4.58E-09                    |
| PEXP_096550                                         | Pc20g06330                                                         | 88.5       | -6.75                                                  | 3.06E-08                    |
| PEXP_037140                                         | Pc21g06360                                                         | 86.6       | -7.61                                                  | 7.77E-14                    |
| PEXP_028230                                         | Pc21g12140                                                         | 88.0       | -3.90                                                  | 2.87E-13                    |
| PEXP_030380                                         | Pc21g15150                                                         | 83.6       | -2.17                                                  | 6.41E-10                    |
| PEXP_096630                                         | Pc21g16000                                                         | 94.2       | -12.20                                                 | 6.41E-17                    |
| PEXP_097170                                         | Pc21g16420                                                         | 80.0       | -8.64                                                  | 1.31E-15                    |
| PEXP_097180                                         | Pc21g16430                                                         | 95.2       | -8.34                                                  | 1.13E-13                    |
| PEXP_097190                                         | Pc21g16440                                                         | 90.7       | -6.57                                                  | 9.55E-13                    |
| PEXP_077410                                         | Pc22g03220                                                         | 94.0       | -3.82                                                  | 1.02E-10                    |
| PEXP_076870                                         | Pc22g06890                                                         | 86.6       | -0.99                                                  | 2.35E-04                    |
| PEXP_091180                                         | Pc22g26950                                                         | 62.3       | -4.38                                                  | 6.23E-07                    |
| PEXP_018490                                         | Pc20g10220                                                         | 82.6       | -10.7                                                  | 9.61E-16                    |

\*The Wisconsin 54-1255 strain was formerly identified as *Penicillium chrysogenum*.

**Supplementary Table 7.** Fifty-nine orthologous genes similarly down-regulated to *abaA* in *Penicillium rubens* [49]  
 $\Delta brlA$  and *Penicillium expansum*  $\Delta brlA$ .

| <i>Penicillium expansum</i><br>strain d1<br>gene ID | <i>Penicillium rubens</i> strain<br>* Wisconsin 54-1255<br>gene ID | % Identity | Log <sub>2</sub> fold change<br>Pe $\Delta brlA$ vs WT | Adjusted<br><i>p</i> -value |
|-----------------------------------------------------|--------------------------------------------------------------------|------------|--------------------------------------------------------|-----------------------------|
| PEXP_023320                                         | Pc12g00010                                                         | 83.2       | -5.43                                                  | 7.80E-14                    |
| PEXP_074900                                         | Pc12g03260                                                         | 74.2       | -7.92                                                  | 1.14E-14                    |
| PEXP_070580                                         | Pc12g08750                                                         | 86.5       | -4.10                                                  | 6.07E-10                    |
| PEXP_025850                                         | Pc12g12350                                                         | 90.8       | 1.49                                                   | 9.90E+05                    |
| PEXP_084240                                         | Pc12g08800                                                         | 82.9       | -4.15                                                  | 8.76E-12                    |
| PEXP_053400                                         | Pc12g13430                                                         | 89.4       | -5.65                                                  | 7.21E-14                    |
| PEXP_052120                                         | Pc12g14960                                                         | 78.5       | -10.10                                                 | 6.09E-17                    |
| PEXP_104370                                         | Pc13g06200                                                         | 86.1       | -4.56                                                  | 1.23E-12                    |
| PEXP_022150                                         | Pc13g06290                                                         | 77.7       | -3.61                                                  | 2.72E-12                    |
| PEXP_006710                                         | Pc13g08700                                                         | 81.2       | -1.94                                                  | 1.67E-10                    |
| PEXP_025390                                         | Pc13g13450                                                         | 90.9       | -7.18                                                  | 8.01E-15                    |
| PEXP_025000                                         | Pc13g13920                                                         | 69.1       | -8.34                                                  | 6.10E-16                    |
| PEXP_000200                                         | Pc14g00160                                                         | 95.7       | -5.57                                                  | 3.94E-13                    |
| PEXP_074520                                         | Pc15g00470                                                         | 76.6       | -1.68                                                  | 4.01E-09                    |
| PEXP_054900                                         | Pc16g00180                                                         | 87.7       | -9.62                                                  | 7.29E-16                    |
| PEXP_085800                                         | Pc16g02410                                                         | 88.2       | -2.51                                                  | 5.36E-11                    |
| PEXP_086170                                         | Pc16g02800                                                         | 61.5       | -6.03                                                  | 2.26E-04                    |
| PEXP_006020                                         | Pc16g04550                                                         | 79.9       | -7.01                                                  | 7.37E-14                    |
| PEXP_015010                                         | Pc16g04840                                                         | 61.4       | -9.46                                                  | 1.59E-15                    |
| PEXP_020090                                         | Pc16g08460                                                         | 97.7       | -3.17                                                  | 2.09E-09                    |
| PEXP_029020                                         | Pc16g09610                                                         | 93.0       | -3.62                                                  | 4.07E-11                    |
| PEXP_001060                                         | Pc16g10900                                                         | 84.3       | -9.51                                                  | 1.43E-16                    |
| PEXP_000580                                         | Pc16g11310                                                         | 77.5       | -6.21                                                  | 1.49E-13                    |
| PEXP_043320                                         | Pc16g13260                                                         | 88.7       | -5.62                                                  | 5.94E-13                    |
| PEXP_056860                                         | Pc18g01150                                                         | 92.4       | -4.96                                                  | 1.58E-12                    |
| PEXP_017120                                         | Pc18g01410                                                         | 88.7       | -3.38                                                  | 9.46E-12                    |
| PEXP_092210                                         | Pc18g02600                                                         | 90.2       | -4.28                                                  | 1.47E-13                    |
| PEXP_031660                                         | Pc18g04570                                                         | 66.0       | -5.95                                                  | 9.64E-12                    |
| PEXP_031670                                         | Pc18g04580                                                         | 93.5       | -7.80                                                  | 3.76E-15                    |
| PEXP_016810                                         | Pc20g01320                                                         | 91.6       | -5.75                                                  | 3.58E-14                    |
| PEXP_073050                                         | Pc20g02080                                                         | 89.9       | -1.49                                                  | 6.57E-07                    |
| PEXP_072230                                         | Pc20g03190                                                         | 87.2       | -3.22                                                  | 6.03E-12                    |
| PEXP_018550                                         | Pc20g10170                                                         | 87.3       | -4.36                                                  | 2.05E-12                    |
| PEXP_063090                                         | Pc20g10270                                                         | 87.9       | -2.75                                                  | 4.31E-09                    |
| PEXP_011470                                         | Pc20g13710                                                         | 67.5       | -7.65                                                  | 1.10E-14                    |
| PEXP_010960                                         | Pc20g14200                                                         | 92.1       | -1.17                                                  | 5.06E-06                    |
| PEXP_088520                                         | Pc21g02590                                                         | 72.0       | -6.66                                                  | 1.17E-13                    |
| PEXP_109240                                         | Pc21g08640                                                         | 88.9       | -1.39                                                  | 1.54E-08                    |

|             |            |      |        |          |
|-------------|------------|------|--------|----------|
| PEXP_108160 | Pc21g09810 | 81.9 | -5.54  | 1.73E-14 |
| PEXP_040480 | Pc21g13950 | 86.3 | -1.57  | 1.56E-07 |
| PEXP_096890 | Pc21g16130 | 68.2 | -8.24  | 7.29E-16 |
| PEXP_097110 | pc21g16380 | 79.2 | -6.57  | 1.58E-12 |
| PEXP_020490 | Pc21g18350 | 76.3 | -11.40 | 1.43E-16 |
| PEXP_020680 | Pc21g18530 | 81.7 | -2.97  | 2.24E-11 |
| PEXP_044610 | Pc21g20790 | 70.7 | -6.44  | 1.95E-13 |
| PEXP_078340 | Pc22g04080 | 76.8 | -5.64  | 7.41E-13 |
| PEXP_078920 | Pc22g04640 | 92.6 | -8.16  | 8.83E-16 |
| PEXP_102970 | Pc22g07130 | 93.1 | -2.95  | 3.93E-09 |
| PEXP_103160 | Pc22g07470 | 89.2 | -7.80  | 1.41E-16 |
| PEXP_103170 | Pc22g07480 | 82.1 | -1.43  | 9.53E-08 |
| PEXP_094000 | Pc22g07760 | 83.9 | -5.22  | 4.79E-13 |
| PEXP_095030 | Pc22g08820 | 54.7 | -3.13  | 2.08E-11 |
| PEXP_013250 | Pc22g12240 | 94.2 | -1.08  | 2.29E-05 |
| PEXP_062290 | Pc22g14290 | 87.8 | -13.00 | 1.07E-18 |
| PEXP_062310 | Pc22g14300 | 76.3 | -10.90 | 7.29E-16 |
| PEXP_062520 | Pc22g14640 | 89.8 | -6.55  | 3.32E-14 |
| PEXP_033790 | Pc22g17040 | 61.3 | -8.30  | 8.53E-16 |
| PEXP_065060 | Pc22g22050 | 91.2 | -1.31  | 4.34E-08 |
| PEXP_066390 | Pc22g23660 | 90.3 | -5.00  | 2.02E-12 |

\*The Wisconsin 54-1255 strain was formerly identified as *Penicillium chrysogenum*.

## Construction and Characterization of the null mutant *PeΔbrlA* strain

### *Creation of a Linear Transformation Cassette using Double-Joint PCR*

For the creation of the null mutant *PeΔbrlA* strain, a strategy was applied to eliminate the *brlA* gene (gene coding for a master transcript factor indispensable to conidiogenesis) by replacing the coding region with the hygromycin selection marker in *Penicillium expansum* wild type NRRL 35695 (WT) strain. Specific primers of the *brlA* gene were designed from the *P. expansum* strain d1, sequence deposited in GenBank (PEXP\_049260) and all primers used in this study are listed in Table S8. The Phusion High-Fidelity DNA Polymerase (Thermo Fisher Scientific, Illkirch, France) was used for all PCR amplifications.

The 5' upstream and 3' downstream flanking regions served as complementary sequences to allow homologous recombination at the locus of interest. The fragments necessary for the construction of the gene disruption marker were amplified by PCR and assembled using double-joint PCR [96, 97]. Shortly, a 1,147 bp DNA fragment that matches the promoter and the 5' untranslated region of the *brlA* gene and a 1,080 bp fragment that matches the 3' untranslated region of the *brlA* gene were amplified from the genomic DNA of the WT strain using two pairs of primers, 5fdebBrlAPex/DebBrlAPex1Rhygro and FinBrlAPex1Fhygro/3rfinBrlAPex, respectively. The hphF1 / hphR1 primer pair was used to amplify a 4,107 bp fragment of pAN 7.1 plasmid (access number Z32698), which contains the hygromycin (*hph*) resistance gene [97]. The underlined sequences in the DebBrlAPex1Rhygro and FinBrlAPex1Fhygro primers were added at their 5' and 3' ends (Table S8). These sequences are identical to the extremities of the PCR product generated by the hphF1 / hphR1 primers, and served to promote binding between PCR products. The PCR conditions for the amplification of the 5' junction and 3' junction were as follows: denaturation at 98 °C for 45 s, followed by 40 denaturation cycles at 98 °C for 45 s, annealing at 61 °C for 45 s and extension at 72 °C for 1 min and 15 s. A final extension step at 72 °C for 10 min was performed. The PCR conditions for the amplification of the hygromycin resistance marker were the same as those described above, except for the annealing temperature (62 °C) and the cycle extension, which was performed for 2 min. The amplicons were purified using a GenElute™PCR Clean-Up Kit (Merck KGaA, Darmstadt, Germany), as described in the procedure specified by the manufacturer.

The three fragments were assembled by double-joint PCR, using a fragment number ratio of 1:2:1 (flank 5': marker: flank 3') according to the procedure described by Lim *et al.* [97] with slight modifications. Briefly, in the first step of the PCR we used the three amplicons previously obtained as matrices and a primerless PCR reaction is achieved, resulting in the union of the two flanking regions, the selection marker, the single-union product and the double-union product (Figure S5). The amplification conditions for this first step were as follows: denaturation at 98 °C for 5 min, followed by 12 denaturation cycles at 98 °C for 45 s, annealing at 60 °C for 2 min and extension at 64 °C for 3 min. A final extension step at 64 °C for 5 min was performed. For the second step of the procedure, the dBrlA-NestedF/dBrlA-NestedR nested primers were used, amplifying only the double-union product. For the amplification conditions a temperature gradient was followed, starting with denaturation at 98 °C for 5 min, followed by a cycle of denaturation at 98 °C for 45 s, annealing at 65 °C for 30 s and extension at 68 °C for 3 min. The annealing temperature decreased by 0.5 °C/cycle to 62 °C, followed by 24 denaturation cycles at 98 °C for 45 s, annealing at 62 °C for 30 s and extension at 68 °C for 3 min. A final extension step at 64 °C for 5 min was performed.

The final PCR product (6,292 bp), containing the hygromycin resistance marker fused to the flanking regions of the *brlA* gene, was used to transform protoplasts of *P. expansum* according to the methodology described by Snini *et al.* [22].



**Supplementary Table 8.** Primers used in the construction and the validation of the null mutant *PeΔbrlA* strain.

| Primer                         | Sequence 5' → 3'                                                  |
|--------------------------------|-------------------------------------------------------------------|
| 5fdebBrlAPex                   | GTAACGCCAGGGTTTCCCAGTCACGACG                                      |
| DebBrlAPex1Rhygro <sup>1</sup> | GAGCCTGTGTGTAGAGATACAAGGGAATTCT <u>GACCCTTGGCTGTAAAGACTGGTAGG</u> |
| FinBrlAPex1Fhygro <sup>1</sup> | GTGTAAGCGCCCACTCCACATCTCCACTCGCGTGGCCTTCATTGGCCTTTATTGATAC        |
| 3rfinBrlAPex                   | GCGGATAACAATTTACACAGGAAACAGC                                      |
| hphF1                          | GAATTCCTTGTATCTCTACACACAGGCTC                                     |
| hphR1                          | CGAGTGGAGATGTGGAGTGGGCG                                           |
| dBrlA-NestedF                  | GTTGCGGCCGGAACCTTGAACC                                            |
| dBrlA-NestedR                  | CCAGAGATGTCTGAGCTCCAATCGC                                         |
| dBrlA-geneF                    | GGCTTCCCCTGGGTGGCAC                                               |
| dBrlA-geneR                    | GCCATCGACGCTCAGCTCGC                                              |
| Hyg5'1 R                       | CTTGACACCGCTCCGTCCTCC                                             |
| Hyg3'1 F                       | GGGTTTACCTCTTCCAGATACAGCTC                                        |
| dBrlA-5'F                      | GGAGTGTGGGAGATCAGGGTCCG                                           |
| dBrlA -3'R                     | CGGTGTAGCGGTGGACTCTGG                                             |
| GWBrIA3'1 <sup>2</sup>         | CTTCACCGCGGCTATATGTATCGTTCAACC                                    |
| GWBrIA3'2 <sup>2</sup>         | GGAACACAGTGCCCCGAATACGCACTG                                       |
| Pexp_brIA Forward <sup>3</sup> | CCTCGATGCCTCAATACA                                                |
| Pexp_brIA Reverse <sup>3</sup> | GTAAAGATTGGACGAGACAAG                                             |
| Pexp_btub Forward <sup>3</sup> | TGAACGTCTACTTCAACCATGCC                                           |
| Pexp_btub Reverse <sup>3</sup> | CCAAATCGACGAGAACGG                                                |

<sup>1</sup>The underlined sequences were added at the 5' end and 3' end were identical to the extremities of the PCR product generated by primers hphF1/hphR1.

<sup>2</sup>Primers used in the validation by genome walking.

<sup>3</sup>Primers used in the validation by qPCR.

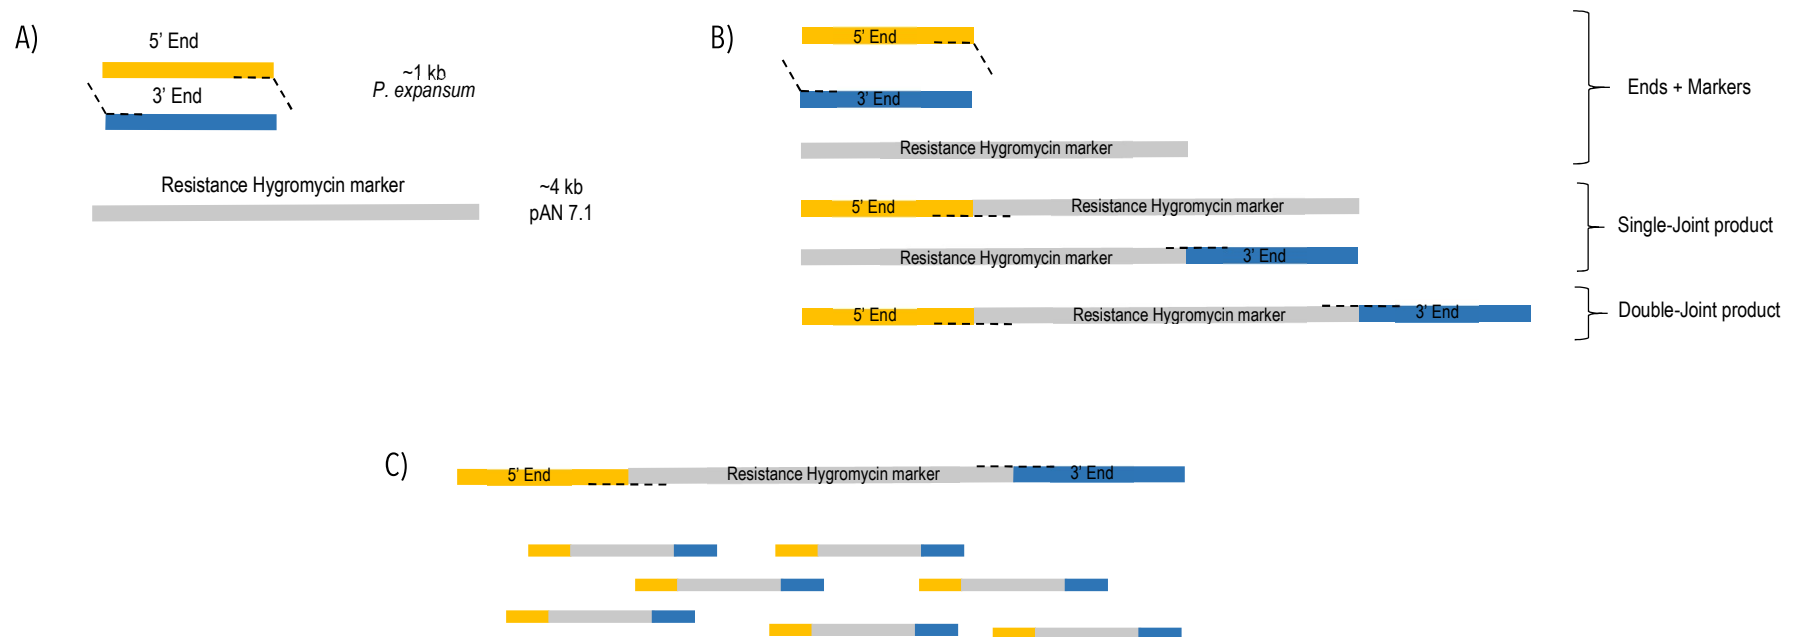

**Supplementary Figure 5.** Double-joint PCR reaction [97]. A) PCR reaction for amplification of flanking regions 5' upstream and 3' downstream of the *brlA* gene from *Penicillium expansum* and amplification of the hygromycin marker from the pAN7.1 plasmid. B) Primerless PCR reaction using the three previously obtained amplicons as matrices. C) Nested PCR reaction for amplification only of the double union product.

## Validation of the Null Mutant Pe $\Delta$ brlA strain

### *Polymerase Chain Reaction (PCR) and Genome Walking*

To confirm the insertion of the hygromycin resistance marker at the *brlA* locus in the transformant strains, a PCR reaction and an enzymatic digestion by genome walking were achieved. First, genomic DNA was extracted according to a previously published method [114] and used to screen the obtained transformants by PCR to detect the replacement between *brlA* and *hph*. The transformants were screened using the dBr1A-geneF/dBr1A-geneR specific primers, according to the PCR conditions: 35 denaturation cycles at 98 °C for 45 s, annealing at 62 °C for 45 s and extension at 72 °C for 1 min and 30 s. A final extension step at 72 °C for 10 min was performed. The *Taq* DNA Polymerase (Thermo Fisher Scientific) was used. Next, PCR amplifications with the dBr1A-5'F/Hyg5'1R and Hyg3'1F/ dBr1A-3'R hygromycin-specific primers were carried out on the selected null mutants. The dBr1A-5'F and dBr1A-3'R primers are located upstream and downstream of the 5' and 3' junctions of the disruption cassette, respectively, and the Hyg5'1R /Hyg3'1F primer pairs are located inside the hygromycin marker. The following PCR conditions were used: 35 denaturation cycles at 98 °C for 45 s, annealing at 60 °C for 45 s and extension at 72 °C for 2 min. A final extension step at 72 °C for 10 min was performed. The Phusion High-Fidelity DNA Polymerase (Thermo Fisher Scientific) was used.

The transformants were also verified by genome walking (GenomeWalker Universal Kit, Takara Bio Europe SAS, Saint-Germain-en-Laye, France), a simple method for finding unknown sequences adjacent to a known genomic DNA sequence. The use of this technique enabled us to verify that the cassette was inserted only once at the *brlA* locus, i.e. that it is present in a single copy in the genome of *P. expansum*. Following the protocol recommended by the manufacturer, the first step consists in constructing groups of uncloned adaptor-ligated genomic DNA fragments, referred to as "libraries". Briefly, aliquots of 2.5 µg of genomic DNA were digested overnight using the restriction enzymes *EcoRV* and *PvuII*. Each batch of digested genomic DNA was then ligated to the GenomeWalker adaptors. After the libraries were constructed, amplification was carried out by specific PCR. The first or primary PCR used the adaptor primer (AP1) provided in the kit and an external gene-specific primer (GSP1): GWBr1A3'1, which was designed from the 3' end sequence of the disruption cassette. For PCR conditions, the two-step cycle parameters were as followed: first, seven denaturation cycles at 94 °C for 25 s and annealing/extension at 72 °C for 3 min, then 32 denaturation cycles at 94 °C for 25 s and extension at 67 °C for 3 min. A final step at 67 °C for seven min was performed. The amplification product obtained from this PCR was diluted (1:50) and used as a template of a second (or nested) PCR. Primers, the nested adaptor primer (AP2) and GWBr1A3'2 (GSP2) were used. For PCR conditions, the two-step cycle parameters were as followed: first, five denaturation cycles at 94 °C for 25 s and annealing/extension at 72 °C for 3 min, then 20 denaturation cycles at 94 °C for 25 s and extension at 67 °C for 3 min. A final step at 67 °C for seven min was performed. The Advantage 2 Polymerase Mix (Takara Bio Europe SAS) was used. The sequences of the primers used are shown in Table S8. Subsequently, the fragments generated by the nested PCR were purified using a GenElute™PCR Clean-Up Kit (Merck KGaA) and two sequencing reaction were performed using the AP2 and GWBr1A3'2 primers by the BIOfidal sequencing laboratory (Vaulx-en-Velin, France). In addition, a restriction mapping was generated from genome walking products using the restriction enzymes *KpnI* and *BstXI* for the PCR product obtained from the *EcoRV* library, which produced fragments of 217, 483 bp and 276, 424 bp, respectively. *HindIII* and *BamHI* enzymes were used for the PCR product of the *PvuII* library, which produced fragments of 298, 3,702 bp and 929, 1159, 2004 bp, respectively, in accordance with the DNA genomic sequence deposited in GenBank (JQFY01000187.1).

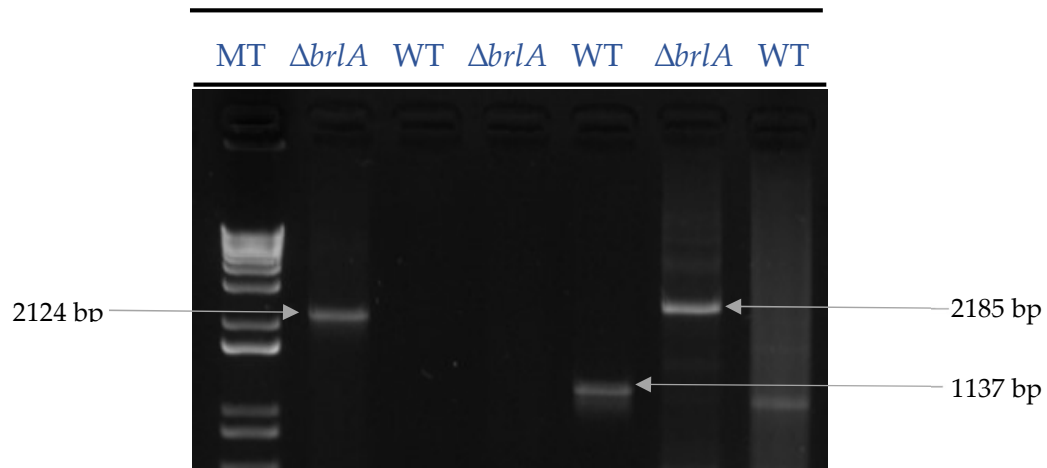

**Supplementary Figure 6.** PCR amplification of *Penicillium expansum* wild type NRRL 35695 (WT) and null mutant *PeΔbrlA* strains. Primers, lane 1 and 2: dBr1A-5'F / Hyg5'1 R, lane 3 and 4: dBr1A-geneF / dBr1A-geneR and lane 5 and 6: Hyg3'1 F / dBr1A -3'R. The presence of the disruption cassette  $\Delta brlA$  at the *brlA* locus was confirmed in null mutant strains amplified fragments of 2,124 bp and 2,185 bp, while no amplification was observed in the WT for PCR with the pair of primers dBr1A-5'F / Hyg5'1 R and Hyg3'1 F / dBr1A -3'R. In contrast, the presence of the *brlA* gene was not detected in the null mutant strain, the WT strain produced an amplicon of 1,137 bp. MT Lane: 1 kb plus DNA ladder.

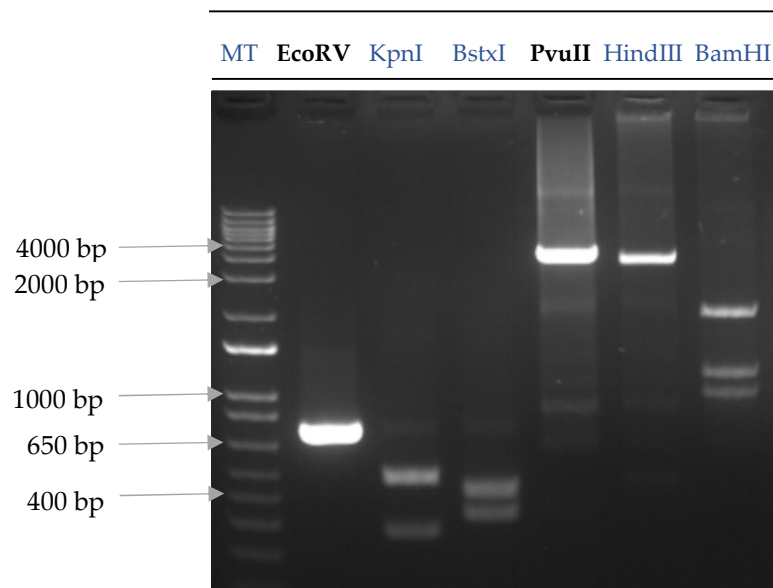

**Supplementary Figure 7.** Genome walking (GW) analyses of genomic DNA of *Penicillium expansum* wild type NRRL 35695 and null mutant *PeΔbrlA* strains. Lane 1 and 4: PCR products with the primers AP2-GWBr1A3'2 from the EcoRV (623 bp) and PvuII (4,009 bp) libraries. Lane 2 and 3: Enzymatic digestion of the EcoRV library amplicon with the enzymes KpnI (217 and 483 bp) and BstXI (276 and 424 bp) Lane 5 and 6: Enzymatic digestion of the PvuII library amplicon with the enzymes HindIII (298 and 3,702 bp) and BamHI (929 and 1,159 and 2,004 bp). MT Lane: 1 kb plus DNA ladder

## Quantitative real-time PCR Validation

To investigate the gene expression of each transformant strain, a qPCR analysis was performed. The WT and null mutant *PeΔbrlA* strains were pre-cultured on MEA medium. A spore suspension was made with the WT strain and the mycelium of the null mutant strain was used as inoculation material as this strain does not produce conidia. The strains were grown in Petri dishes containing MEA covered with sterile cellophane sheets (10  $\mu$ L of a  $10^6$  spores/mL solution for the WT strain, 5 mm<sup>2</sup> mycelium for the null mutant strain) and incubated at 25 °C in the dark for five days. At the end of the growth period, total RNA was isolated. From each strain, 110-120 mg of mycelium were weighed and transferred to lysing matrix D tubes (1.4 mm ceramic spheres, Thermo Fisher Scientific), to which 760  $\mu$ L of lysis buffer [10  $\mu$ L of  $\beta$ -mercaptoethanol (Applied Biosystem, Thermo Fisher Scientific) and 750  $\mu$ L of RLT buffer (Rneasy mini kit, QIAGEN, Courtaboeuf, France)] were added, and were placed in liquid nitrogen. The mycelium cells homogenized in a Precellys homogenizer (Bertin Technologies, Montigny-le Bretonneux, France) by three grindings at a speed of: 6,500 rpm during 15 s followed by 5 min incubation on ice, 6,500 rpm for 25 s and 5 min on ice and finally 6,500 rpm for 15 s. The samples were subsequently centrifuged at 16,000 g for 10 min at 4 °C. The supernatant was recovered into QIAshredder spin columns (QIAGEN) and processed according to the Rneasy mini kit (QIAGEN) protocol, detailed by Tannous *et al.* [20]. The total RNA extracted was purified using gDNA-eliminator mini-columns (QIAGEN). The RNA quality was checked by gel electrophoresis (1.2% agarose) and the concentration was determined by a NanoDrop ND1000 (Labtech, Palaiseau, France). The final RNA concentrations were around 153-255 ng/ $\mu$ L ( $A_{260/280}$ = 2.14) and 304-335 ng/ $\mu$ L ( $A_{260-280}$ = 2.10) for the *PeΔbrlA* and WT strain respectively.

For the reverse transcription step we used a volume of 10  $\mu$ L of RNA adjusted to a final concentration of 153 ng/ $\mu$ L and 1  $\mu$ L of oligo (dT) Bys 3' Primer: (5'-GCTGTCAACGATACGCTATAACGGCATGACAGTGTTCCTTTT-3') according to the protocol detailed by Caceres *et al.* [115].

The qPCR experiment was performed with a 7300 Real Time PCR System (Applied Biosystems, Thermo Fisher Scientific) using the three-step cycling. The primers Pexp\_br1A Forward and Pexp\_br1A Reverse (Table S8) were used to amplify 50-100 bp of the *brlA* target gene (PEXP\_049260). The  $\beta$ -tubulin gene was used as the reference gene. The primers were designed and validated as described previously [115]. PCR amplification was carried out in a total volume of 25  $\mu$ L, using 5  $\mu$ L of cDNA template, 12.5  $\mu$ L of SYBR Green PCR Master Mix (Applied Biosystems, Thermo Fisher Scientific) and 7.5  $\mu$ L of primers mix (900 nM and 300 nM for the *brlA* forward/reverse primers, respectively, and 300 nM for the reference gene primers). The following PCR program was used: denaturation at 95 °C for 10 min, followed by 40 denaturation cycles at 95 °C for 15 s, annealing at 60 °C for 1 min, and a final extension step at 95 °C for 15 s, 60 °C for 1 min, 95 °C for 15 s and 60 °C for 15 s was achieved. The melting curves were analyzed with the 7300 System SDS Software (Applied Biosystems, Thermo Fisher Scientific) to confirm the specificity of the amplification. Changes in gene expression of qPCR experiments were analyzed using the  $2^{-\Delta\Delta CT}$  method [116]. The Student's t-test was performed as a statistical analysis using Graph Pad 4 software (GraphPad Software, San Diego, CA, USA), a *p*-value < 0.05 was considered statistically significant. Four biological replicates were performed for each strain.

The RNA extraction and qPCR methodology was also used to confirm the results obtained in the microarray analysis, where the expression of all the genes of the putative chaetoglobosin cluster was evaluated. We used the RNA samples that served for the microarray analysis. The primers used are listed in Table S3.

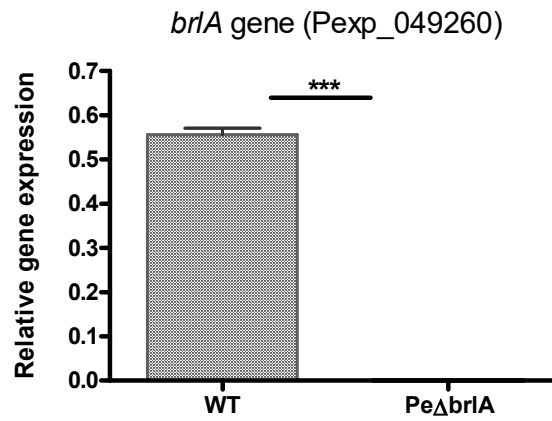

**Supplementary Figure 8.** Validation by quantitative real-time PCR analysis. The expression of the *brlA* gene was evaluated in *Penicillium expansum* wild type NRRL 35695 (WT) and in the null mutant Pe $\Delta$ *brlA* strains. The Student's t-test was performed using GraphPad Software. The graph shows the mean  $\pm$  standard error of the mean (SEM) from four biological replicates. *p*-value considered statistically significant: \* *p*-value < 0.05; \*\* *p*-value < 0.01; \*\*\* *p*-value < 0.001.

## References

114. Moore, G.G.; Mack, B.M.; Beltz, S.B.; Puel, O. Genome sequence of an aflatoxigenic pathogen of Argentinian peanut, *Aspergillus arachidicola*. *BMC Genom.* **2018**, *19*, 189, doi:10.1186/s12864-018-4576-2.
115. Caceres, I.; El Khoury, R.; Medina, A.; Lippi, Y.; Naylies, C.; Atoui, A.; El Khoury, A.; Oswald, I.P.; Bailly, J.-D.; Puel, O. Deciphering the anti-aflatoxinogenic properties of eugenol using a large-scale q-PCR approach. *Toxins* **2016**, *8*, 123, doi:10.3390/toxins8050123.
116. Livak, K.J.; Schmittgen, T.D. Analysis of relative gene expression data using real-time quantitative PCR and the 2- $\Delta\Delta$ CT method. *Methods* **2001**, *25*, 402–408.
